# Supplementary material for: Circular Network of Coregulated Sphingolipids Dictates Chronic Hypoxia Damage in Patients With Tetralogy of Fallot
Source: PubMed Central journal article supplement (PMC8792512; doi:10.3389/fcvm.2021.780123), 2022-01-13
Supplement: Table_4.pdf [file Table_4.pdf]

Table S4. The sphingomyelin metabolism related differentially expressed metabolites in right atrial biopsies.

| ID           | Formula    | Compounds       | Class I | Class II | VIP  | Log2FC | Type |
|--------------|------------|-----------------|---------|----------|------|--------|------|
| LIPID-P-0111 | C36H71NO3  | Cer(d18:1/18:0) | SL      | Cer      | 1.37 | 1.12   | up   |
| LIPID-P-0398 | C22H46NO6P | LPC(O-14:1)     | GP      | LPC-O    | 1.94 | -1.32  | down |
| LIPID-N-0151 | C25H50NO7P | LPE(0:0/20:1)   | GP      | LPE      | 2.61 | -1.40  | down |
| LIPID-N-0152 | C25H50NO7P | LPE(20:1/0:0)   | GP      | LPE      | 2.33 | -1.22  | down |
| LIPID-N-0188 | C26H52NO9P | LPS(20:0/0:0)   | GP      | LPS      | 1.89 | -1.03  | down |
| LIPID-N-0196 | C24H44NO9P | LPS(18:2/0:0)   | GP      | LPS      | 1.84 | -1.28  | down |
| LIPID-P-0505 | C42H76NO8P | PC(14:0_20:4)   | GP      | PC       | 1.66 | 1.10   | up   |
| LIPID-P-0508 | C45H80NO8P | PC(20:4_17:0)   | GP      | PC       | 1.19 | 1.26   | up   |
| LIPID-P-0520 | C44H76NO8P | PC(14:0_22:6)   | GP      | PC       | 1.61 | 1.10   | up   |
| LIPID-P-0555 | C46H86NO7P | PC(O-18:0_20:4) | GP      | PC-O     | 1.58 | 1.03   | up   |
| LIPID-P-0567 | C50H90NO7P | PC(O-22:2_20:4) | GP      | PC-O     | 2.02 | 1.30   | up   |
| LIPID-N-0397 | C41H72NO8P | PE(16:0_20:5)   | GP      | PE       | 2.40 | -1.28  | down |
| LIPID-N-0429 | C47H80NO8P | PE(22:6_20:1)   | GP      | PE       | 2.07 | -1.23  | down |
| LIPID-N-0465 | C46H77O10P | PG(18:1_22:6)   | GP      | PG       | 2.48 | -1.58  | down |
| LIPID-P-0689 | C46H75O10P | PG(18:2_22:6)   | GP      | PG       | 1.77 | -1.23  | down |
