# Supplementary material for: Circular Network of Coregulated Sphingolipids Dictates Chronic Hypoxia Damage in Patients With Tetralogy of Fallot
Source: PubMed Central journal article supplement (PMC8792512; doi:10.3389/fcvm.2021.780123), 2022-01-13
Supplement: Table_5.pdf [file Table_5.pdf]

Table S5. The partial correlation between sphingomyelin related metabolites and clinical phenotypes in patients with TOF in serum.

| source       | target       | pearson_corr | weight |
|--------------|--------------|--------------|--------|
| LIPID.N.0229 | LIPID.N.0250 | 0.865        | 0.865  |
| LIPID.N.0229 | LIPID.N.0276 | 0.744        | 0.744  |
| LIPID.N.0229 | LIPID.P.0480 | 0.661        | 0.661  |
| LIPID.N.0229 | LIPID.P.0481 | 0.830        | 0.830  |
| LIPID.N.0229 | LIPID.P.0491 | 0.133        | 0.133  |
| LIPID.N.0229 | LIPID.P.0506 | 0.346        | 0.346  |
| LIPID.N.0229 | LIPID.P.0508 | 0.180        | 0.180  |
| LIPID.N.0229 | LIPID.P.0521 | 0.194        | 0.194  |
| LIPID.N.0229 | LIPID.N.0413 | 0.702        | 0.702  |
| LIPID.N.0229 | LIPID.N.0426 | 0.310        | 0.310  |
| LIPID.N.0229 | LIPID.P.0759 | 0.151        | 0.151  |
| LIPID.N.0229 | MEDP1686     | 0.232        | 0.232  |
| LIPID.N.0229 | MEDP1697     | 0.452        | 0.452  |
| LIPID.N.0229 | MEDP1699     | 0.704        | 0.704  |
| LIPID.N.0229 | MEDP1779     | 0.264        | 0.264  |
| LIPID.N.0229 | LIPID.N.0119 | 0.781        | 0.781  |
| LIPID.N.0229 | LIPID.N.0132 | 0.660        | 0.660  |
| LIPID.N.0229 | LIPID.P.0351 | 0.341        | 0.341  |
| LIPID.N.0229 | LIPID.P.0352 | 0.394        | 0.394  |
| LIPID.N.0229 | LIPID.P.0355 | 0.361        | 0.361  |
| LIPID.N.0229 | LIPID.P.0387 | 0.494        | 0.494  |
| LIPID.N.0229 | LIPID.P.0388 | 0.549        | 0.549  |
| LIPID.N.0229 | LIPID.P.0391 | 0.559        | 0.559  |
| LIPID.N.0229 | MEDN1264     | 0.374        | 0.374  |
| LIPID.N.0229 | MEDN1267     | 0.334        | 0.334  |
| LIPID.N.0229 | MEDN1269     | 0.046        | 0.046  |
| LIPID.N.0229 | MEDN1287     | 0.516        | 0.516  |
| LIPID.N.0229 | MEDP1875     | 0.320        | 0.320  |
| LIPID.N.0229 | LIPID.N.0161 | 0.655        | 0.655  |
| LIPID.N.0229 | LIPID.N.0165 | 0.542        | 0.542  |
| LIPID.N.0229 | LIPID.P.0429 | 0.422        | 0.422  |
| LIPID.N.0229 | LIPID.P.0430 | 0.692        | 0.692  |
| LIPID.N.0229 | LIPID.P.0433 | 0.554        | 0.554  |
| LIPID.N.0229 | LIPID.P.0436 | 0.598        | 0.598  |
| LIPID.N.0229 | LIPID.P.0131 | 0.526        | 0.526  |
| LIPID.N.0229 | MEDP0618     | 0.064        | 0.064  |
| LIPID.N.0229 | MEDP1433     | 0.116        | 0.116  |

|                     |              |       |       |
|---------------------|--------------|-------|-------|
| <b>LIPID.N.0229</b> | LIPID.P.0495 | 0.262 | 0.262 |
| <b>LIPID.N.0229</b> | LIPID.P.0550 | 0.204 | 0.204 |
| <b>LIPID.N.0229</b> | LIPID.P.0363 | 0.367 | 0.367 |
| <b>LIPID.N.0229</b> | LIPID.P.0153 | 0.182 | 0.182 |
| <b>LIPID.P.0480</b> | EF           | 0.011 | 0.011 |
| <b>LIPID.P.0387</b> | EF           | 0.013 | 0.013 |
| <b>LIPID.P.0388</b> | EF           | 0.036 | 0.036 |
| <b>LIPID.N.0250</b> | LIPID.N.0276 | 0.926 | 0.926 |
| <b>LIPID.N.0250</b> | LIPID.P.0480 | 0.758 | 0.758 |
| <b>LIPID.N.0250</b> | LIPID.P.0481 | 0.851 | 0.851 |
| <b>LIPID.N.0250</b> | LIPID.P.0491 | 0.267 | 0.267 |
| <b>LIPID.N.0250</b> | LIPID.P.0506 | 0.431 | 0.431 |
| <b>LIPID.N.0250</b> | LIPID.P.0508 | 0.345 | 0.345 |
| <b>LIPID.N.0250</b> | LIPID.P.0521 | 0.305 | 0.305 |
| <b>LIPID.N.0250</b> | LIPID.N.0413 | 0.921 | 0.921 |
| <b>LIPID.N.0250</b> | LIPID.N.0426 | 0.417 | 0.417 |
| <b>LIPID.N.0250</b> | LIPID.P.0759 | 0.312 | 0.312 |
| <b>LIPID.N.0250</b> | MEDP1686     | 0.296 | 0.296 |
| <b>LIPID.N.0250</b> | MEDP1697     | 0.351 | 0.351 |
| <b>LIPID.N.0250</b> | MEDP1699     | 0.712 | 0.712 |
| <b>LIPID.N.0250</b> | MEDP1779     | 0.219 | 0.219 |
| <b>LIPID.N.0250</b> | LIPID.N.0119 | 0.847 | 0.847 |
| <b>LIPID.N.0250</b> | LIPID.N.0132 | 0.735 | 0.735 |
| <b>LIPID.N.0250</b> | LIPID.P.0351 | 0.385 | 0.385 |
| <b>LIPID.N.0250</b> | LIPID.P.0352 | 0.429 | 0.429 |
| <b>LIPID.N.0250</b> | LIPID.P.0355 | 0.450 | 0.450 |
| <b>LIPID.N.0250</b> | LIPID.P.0387 | 0.550 | 0.550 |
| <b>LIPID.N.0250</b> | LIPID.P.0388 | 0.598 | 0.598 |
| <b>LIPID.N.0250</b> | LIPID.P.0391 | 0.638 | 0.638 |
| <b>LIPID.N.0250</b> | MEDN1264     | 0.476 | 0.476 |
| <b>LIPID.N.0250</b> | MEDN1267     | 0.402 | 0.402 |
| <b>LIPID.N.0250</b> | MEDN1269     | 0.147 | 0.147 |
| <b>LIPID.N.0250</b> | MEDN1287     | 0.503 | 0.503 |
| <b>LIPID.N.0250</b> | MEDP1875     | 0.341 | 0.341 |
| <b>LIPID.N.0250</b> | LIPID.N.0161 | 0.787 | 0.787 |
| <b>LIPID.N.0250</b> | LIPID.N.0165 | 0.723 | 0.723 |
| <b>LIPID.N.0250</b> | LIPID.P.0429 | 0.521 | 0.521 |
| <b>LIPID.N.0250</b> | LIPID.P.0430 | 0.778 | 0.778 |
| <b>LIPID.N.0250</b> | LIPID.P.0433 | 0.675 | 0.675 |
| <b>LIPID.N.0250</b> | LIPID.P.0436 | 0.708 | 0.708 |
| <b>LIPID.N.0250</b> | LIPID.P.0131 | 0.637 | 0.637 |
| <b>LIPID.N.0250</b> | MEDP0618     | 0.123 | 0.123 |
| <b>LIPID.N.0250</b> | MEDP1433     | 0.165 | 0.165 |

|                     |              |       |       |
|---------------------|--------------|-------|-------|
| <b>LIPID.N.0250</b> | MEDP1917     | 0.009 | 0.009 |
| <b>LIPID.N.0250</b> | LIPID.P.0550 | 0.034 | 0.034 |
| <b>LIPID.N.0250</b> | LIPID.P.0363 | 0.053 | 0.053 |
| <b>LIPID.N.0250</b> | LIPID.P.0153 | 0.339 | 0.339 |
| <b>MEDN1287</b>     | EF           | 0.062 | 0.062 |
| <b>LIPID.P.0436</b> | EF           | 0.062 | 0.062 |
| <b>MEDP1416</b>     | EF           | 0.067 | 0.067 |
| <b>LIPID.N.0161</b> | EF           | 0.084 | 0.084 |
| <b>LIPID.N.0276</b> | LIPID.P.0480 | 0.680 | 0.680 |
| <b>LIPID.N.0276</b> | LIPID.P.0481 | 0.858 | 0.858 |
| <b>LIPID.N.0276</b> | LIPID.P.0491 | 0.170 | 0.170 |
| <b>LIPID.N.0276</b> | LIPID.P.0506 | 0.314 | 0.314 |
| <b>LIPID.N.0276</b> | LIPID.P.0508 | 0.252 | 0.252 |
| <b>LIPID.N.0276</b> | LIPID.P.0521 | 0.180 | 0.180 |
| <b>LIPID.N.0276</b> | LIPID.N.0413 | 0.953 | 0.953 |
| <b>LIPID.N.0276</b> | LIPID.N.0426 | 0.310 | 0.310 |
| <b>LIPID.N.0276</b> | LIPID.P.0759 | 0.213 | 0.213 |
| <b>LIPID.N.0276</b> | MEDP1686     | 0.149 | 0.149 |
| <b>LIPID.N.0276</b> | MEDP1697     | 0.163 | 0.163 |
| <b>LIPID.N.0276</b> | MEDP1699     | 0.709 | 0.709 |
| <b>LIPID.N.0276</b> | LIPID.N.0119 | 0.823 | 0.823 |
| <b>LIPID.N.0276</b> | LIPID.N.0132 | 0.716 | 0.716 |
| <b>LIPID.N.0276</b> | LIPID.P.0351 | 0.223 | 0.223 |
| <b>LIPID.N.0276</b> | LIPID.P.0352 | 0.282 | 0.282 |
| <b>LIPID.N.0276</b> | LIPID.P.0355 | 0.338 | 0.338 |
| <b>LIPID.N.0276</b> | LIPID.P.0387 | 0.553 | 0.553 |
| <b>LIPID.N.0276</b> | LIPID.P.0388 | 0.598 | 0.598 |
| <b>LIPID.N.0276</b> | LIPID.P.0391 | 0.617 | 0.617 |
| <b>LIPID.N.0276</b> | MEDN1264     | 0.477 | 0.477 |
| <b>LIPID.N.0276</b> | MEDN1267     | 0.361 | 0.361 |
| <b>LIPID.N.0276</b> | MEDN1269     | 0.029 | 0.029 |
| <b>LIPID.N.0276</b> | MEDN1287     | 0.499 | 0.499 |
| <b>LIPID.N.0276</b> | MEDP1875     | 0.397 | 0.397 |
| <b>LIPID.N.0276</b> | LIPID.N.0161 | 0.711 | 0.711 |
| <b>LIPID.N.0276</b> | LIPID.N.0165 | 0.582 | 0.582 |
| <b>LIPID.N.0276</b> | LIPID.P.0429 | 0.590 | 0.590 |
| <b>LIPID.N.0276</b> | LIPID.P.0430 | 0.759 | 0.759 |
| <b>LIPID.N.0276</b> | LIPID.P.0433 | 0.753 | 0.753 |
| <b>LIPID.N.0276</b> | LIPID.P.0436 | 0.716 | 0.716 |
| <b>LIPID.N.0276</b> | LIPID.P.0131 | 0.578 | 0.578 |
| <b>LIPID.N.0276</b> | LIPID.P.0550 | 0.214 | 0.214 |
| <b>LIPID.N.0276</b> | LIPID.P.0363 | 0.066 | 0.066 |
| <b>LIPID.N.0276</b> | LIPID.P.0153 | 0.611 | 0.611 |

|                     |              |       |       |
|---------------------|--------------|-------|-------|
| <b>LIPID.N.0413</b> | EF           | 0.089 | 0.089 |
| <b>LIPID.P.0391</b> | EF           | 0.106 | 0.106 |
| <b>LIPID.N.0276</b> | EF           | 0.110 | 0.110 |
| <b>LIPID.P.0480</b> | LIPID.P.0481 | 0.753 | 0.753 |
| <b>LIPID.P.0480</b> | LIPID.P.0491 | 0.660 | 0.660 |
| <b>LIPID.P.0480</b> | LIPID.P.0506 | 0.783 | 0.783 |
| <b>LIPID.P.0480</b> | LIPID.P.0508 | 0.692 | 0.692 |
| <b>LIPID.P.0480</b> | LIPID.P.0521 | 0.673 | 0.673 |
| <b>LIPID.P.0480</b> | LIPID.N.0413 | 0.826 | 0.826 |
| <b>LIPID.P.0480</b> | LIPID.N.0426 | 0.760 | 0.760 |
| <b>LIPID.P.0480</b> | LIPID.P.0759 | 0.727 | 0.727 |
| <b>LIPID.P.0480</b> | MEDP1686     | 0.701 | 0.701 |
| <b>LIPID.P.0480</b> | MEDP1697     | 0.474 | 0.474 |
| <b>LIPID.P.0480</b> | MEDP1699     | 0.617 | 0.617 |
| <b>LIPID.P.0480</b> | MEDP1779     | 0.374 | 0.374 |
| <b>LIPID.P.0480</b> | LIPID.N.0119 | 0.581 | 0.581 |
| <b>LIPID.P.0480</b> | LIPID.N.0132 | 0.553 | 0.553 |
| <b>LIPID.P.0480</b> | LIPID.P.0351 | 0.812 | 0.812 |
| <b>LIPID.P.0480</b> | LIPID.P.0352 | 0.826 | 0.826 |
| <b>LIPID.P.0480</b> | LIPID.P.0355 | 0.824 | 0.824 |
| <b>LIPID.P.0480</b> | LIPID.P.0387 | 0.669 | 0.669 |
| <b>LIPID.P.0480</b> | LIPID.P.0388 | 0.672 | 0.672 |
| <b>LIPID.P.0480</b> | LIPID.P.0391 | 0.622 | 0.622 |
| <b>LIPID.P.0480</b> | MEDN1264     | 0.781 | 0.781 |
| <b>LIPID.P.0480</b> | MEDN1267     | 0.747 | 0.747 |
| <b>LIPID.P.0480</b> | MEDN1269     | 0.674 | 0.674 |
| <b>LIPID.P.0480</b> | MEDN1287     | 0.659 | 0.659 |
| <b>LIPID.P.0480</b> | MEDP1875     | 0.610 | 0.610 |
| <b>LIPID.P.0480</b> | LIPID.N.0161 | 0.741 | 0.741 |
| <b>LIPID.P.0480</b> | LIPID.N.0165 | 0.827 | 0.827 |
| <b>LIPID.P.0480</b> | LIPID.P.0429 | 0.706 | 0.706 |
| <b>LIPID.P.0480</b> | LIPID.P.0430 | 0.814 | 0.814 |
| <b>LIPID.P.0480</b> | LIPID.P.0433 | 0.704 | 0.704 |
| <b>LIPID.P.0480</b> | LIPID.P.0436 | 0.783 | 0.783 |
| <b>LIPID.P.0480</b> | LIPID.P.0131 | 0.835 | 0.835 |
| <b>LIPID.P.0480</b> | MEDP0618     | 0.582 | 0.582 |
| <b>LIPID.P.0480</b> | MEDP1412     | 0.402 | 0.402 |
| <b>LIPID.P.0480</b> | MEDP1416     | 0.195 | 0.195 |
| <b>LIPID.P.0480</b> | MEDP1433     | 0.623 | 0.623 |
| <b>LIPID.P.0480</b> | MEDP1917     | 0.452 | 0.452 |
| <b>LIPID.P.0480</b> | LIPID.P.0047 | 0.356 | 0.356 |
| <b>LIPID.P.0480</b> | LIPID.P.0153 | 0.220 | 0.220 |
| <b>MEDP1779</b>     | EF           | 0.134 | 0.134 |

|                     |              |       |       |
|---------------------|--------------|-------|-------|
| <b>LIPID.N.0250</b> | EF           | 0.187 | 0.187 |
| <b>LIPID.N.0426</b> | EF           | 0.226 | 0.226 |
| <b>MEDP1699</b>     | EF           | 0.249 | 0.249 |
| <b>LIPID.P.0481</b> | LIPID.P.0491 | 0.093 | 0.093 |
| <b>LIPID.P.0481</b> | LIPID.P.0506 | 0.296 | 0.296 |
| <b>LIPID.P.0481</b> | LIPID.P.0508 | 0.177 | 0.177 |
| <b>LIPID.P.0481</b> | LIPID.P.0521 | 0.151 | 0.151 |
| <b>LIPID.P.0481</b> | LIPID.N.0413 | 0.858 | 0.858 |
| <b>LIPID.P.0481</b> | LIPID.N.0426 | 0.386 | 0.386 |
| <b>LIPID.P.0481</b> | LIPID.P.0759 | 0.174 | 0.174 |
| <b>LIPID.P.0481</b> | MEDP1686     | 0.113 | 0.113 |
| <b>LIPID.P.0481</b> | MEDP1697     | 0.339 | 0.339 |
| <b>LIPID.P.0481</b> | MEDP1699     | 0.904 | 0.904 |
| <b>LIPID.P.0481</b> | MEDP1779     | 0.028 | 0.028 |
| <b>LIPID.P.0481</b> | LIPID.N.0119 | 0.848 | 0.848 |
| <b>LIPID.P.0481</b> | LIPID.N.0132 | 0.834 | 0.834 |
| <b>LIPID.P.0481</b> | LIPID.P.0351 | 0.277 | 0.277 |
| <b>LIPID.P.0481</b> | LIPID.P.0352 | 0.316 | 0.316 |
| <b>LIPID.P.0481</b> | LIPID.P.0355 | 0.318 | 0.318 |
| <b>LIPID.P.0481</b> | LIPID.P.0387 | 0.800 | 0.800 |
| <b>LIPID.P.0481</b> | LIPID.P.0388 | 0.837 | 0.837 |
| <b>LIPID.P.0481</b> | LIPID.P.0391 | 0.829 | 0.829 |
| <b>LIPID.P.0481</b> | MEDN1264     | 0.667 | 0.667 |
| <b>LIPID.P.0481</b> | MEDN1267     | 0.600 | 0.600 |
| <b>LIPID.P.0481</b> | MEDN1269     | 0.151 | 0.151 |
| <b>LIPID.P.0481</b> | MEDN1287     | 0.759 | 0.759 |
| <b>LIPID.P.0481</b> | MEDP1875     | 0.535 | 0.535 |
| <b>LIPID.P.0481</b> | LIPID.N.0161 | 0.793 | 0.793 |
| <b>LIPID.P.0481</b> | LIPID.N.0165 | 0.628 | 0.628 |
| <b>LIPID.P.0481</b> | LIPID.P.0429 | 0.765 | 0.765 |
| <b>LIPID.P.0481</b> | LIPID.P.0430 | 0.845 | 0.845 |
| <b>LIPID.P.0481</b> | LIPID.P.0433 | 0.870 | 0.870 |
| <b>LIPID.P.0481</b> | LIPID.P.0436 | 0.885 | 0.885 |
| <b>LIPID.P.0481</b> | LIPID.P.0131 | 0.518 | 0.518 |
| <b>LIPID.P.0481</b> | LIPID.P.0550 | 0.128 | 0.128 |
| <b>LIPID.P.0481</b> | LIPID.P.0363 | 0.163 | 0.163 |
| <b>LIPID.P.0481</b> | LIPID.P.0153 | 0.330 | 0.330 |
| <b>LIPID.P.0481</b> | EF           | 0.256 | 0.256 |
| <b>MEDP1697</b>     | EF           | 0.298 | 0.298 |
| <b>LIPID.N.0132</b> | EF           | 0.306 | 0.306 |
| <b>LIPID.N.0119</b> | EF           | 0.330 | 0.330 |
| <b>LIPID.P.0491</b> | LIPID.P.0506 | 0.966 | 0.966 |
| <b>LIPID.P.0491</b> | LIPID.P.0508 | 0.988 | 0.988 |

|                     |              |       |       |
|---------------------|--------------|-------|-------|
| <b>LIPID.P.0491</b> | LIPID.P.0521 | 0.978 | 0.978 |
| <b>LIPID.P.0491</b> | LIPID.N.0413 | 0.362 | 0.362 |
| <b>LIPID.P.0491</b> | LIPID.N.0426 | 0.548 | 0.548 |
| <b>LIPID.P.0491</b> | LIPID.P.0759 | 0.973 | 0.973 |
| <b>LIPID.P.0491</b> | MEDP1686     | 0.850 | 0.850 |
| <b>LIPID.P.0491</b> | MEDP1697     | 0.057 | 0.057 |
| <b>LIPID.P.0491</b> | MEDP1779     | 0.285 | 0.285 |
| <b>LIPID.P.0491</b> | LIPID.P.0351 | 0.885 | 0.885 |
| <b>LIPID.P.0491</b> | LIPID.P.0352 | 0.920 | 0.920 |
| <b>LIPID.P.0491</b> | LIPID.P.0355 | 0.928 | 0.928 |
| <b>LIPID.P.0491</b> | LIPID.P.0387 | 0.034 | 0.034 |
| <b>LIPID.P.0491</b> | LIPID.P.0388 | 0.030 | 0.030 |
| <b>LIPID.P.0491</b> | MEDN1264     | 0.383 | 0.383 |
| <b>LIPID.P.0491</b> | MEDN1267     | 0.336 | 0.336 |
| <b>LIPID.P.0491</b> | MEDN1269     | 0.751 | 0.751 |
| <b>LIPID.P.0491</b> | MEDN1287     | 0.011 | 0.011 |
| <b>LIPID.P.0491</b> | MEDP1875     | 0.202 | 0.202 |
| <b>LIPID.P.0491</b> | LIPID.N.0161 | 0.115 | 0.115 |
| <b>LIPID.P.0491</b> | LIPID.N.0165 | 0.444 | 0.444 |
| <b>LIPID.P.0491</b> | LIPID.P.0429 | 0.174 | 0.174 |
| <b>LIPID.P.0491</b> | LIPID.P.0430 | 0.245 | 0.245 |
| <b>LIPID.P.0491</b> | LIPID.P.0433 | 0.069 | 0.069 |
| <b>LIPID.P.0491</b> | LIPID.P.0436 | 0.139 | 0.139 |
| <b>LIPID.P.0491</b> | LIPID.P.0131 | 0.779 | 0.779 |
| <b>LIPID.P.0491</b> | MEDP0618     | 0.804 | 0.804 |
| <b>LIPID.P.0491</b> | MEDP1412     | 0.617 | 0.617 |
| <b>LIPID.P.0491</b> | MEDP1416     | 0.233 | 0.233 |
| <b>LIPID.P.0491</b> | MEDP1433     | 0.879 | 0.879 |
| <b>LIPID.P.0491</b> | MEDP1917     | 0.676 | 0.676 |
| <b>LIPID.P.0491</b> | LIPID.P.0047 | 0.533 | 0.533 |
| <b>LIPID.P.0491</b> | LIPID.P.0628 | 0.042 | 0.042 |
| <b>LIPID.P.0491</b> | LIPID.P.0153 | 0.156 | 0.156 |
| <b>LIPID.N.0229</b> | EF           | 0.366 | 0.366 |
| <b>LIPID.P.0153</b> | IVS          | 0.126 | 0.126 |
| <b>LIPID.P.0363</b> | IVS          | 0.442 | 0.442 |
| <b>LIPID.P.0506</b> | LIPID.P.0508 | 0.971 | 0.971 |
| <b>LIPID.P.0506</b> | LIPID.P.0521 | 0.970 | 0.970 |
| <b>LIPID.P.0506</b> | LIPID.N.0413 | 0.493 | 0.493 |
| <b>LIPID.P.0506</b> | LIPID.N.0426 | 0.620 | 0.620 |
| <b>LIPID.P.0506</b> | LIPID.P.0759 | 0.965 | 0.965 |
| <b>LIPID.P.0506</b> | MEDP1686     | 0.832 | 0.832 |
| <b>LIPID.P.0506</b> | MEDP1697     | 0.149 | 0.149 |
| <b>LIPID.P.0506</b> | MEDP1699     | 0.038 | 0.038 |

|                     |              |       |       |
|---------------------|--------------|-------|-------|
| <b>LIPID.P.0506</b> | MEDP1779     | 0.276 | 0.276 |
| <b>LIPID.P.0506</b> | LIPID.N.0119 | 0.014 | 0.014 |
| <b>LIPID.P.0506</b> | LIPID.P.0351 | 0.919 | 0.919 |
| <b>LIPID.P.0506</b> | LIPID.P.0352 | 0.962 | 0.962 |
| <b>LIPID.P.0506</b> | LIPID.P.0355 | 0.954 | 0.954 |
| <b>LIPID.P.0506</b> | LIPID.P.0387 | 0.154 | 0.154 |
| <b>LIPID.P.0506</b> | LIPID.P.0388 | 0.165 | 0.165 |
| <b>LIPID.P.0506</b> | LIPID.P.0391 | 0.072 | 0.072 |
| <b>LIPID.P.0506</b> | MEDN1264     | 0.434 | 0.434 |
| <b>LIPID.P.0506</b> | MEDN1267     | 0.386 | 0.386 |
| <b>LIPID.P.0506</b> | MEDN1269     | 0.707 | 0.707 |
| <b>LIPID.P.0506</b> | MEDN1287     | 0.129 | 0.129 |
| <b>LIPID.P.0506</b> | MEDP1875     | 0.236 | 0.236 |
| <b>LIPID.P.0506</b> | LIPID.N.0161 | 0.244 | 0.244 |
| <b>LIPID.P.0506</b> | LIPID.N.0165 | 0.528 | 0.528 |
| <b>LIPID.P.0506</b> | LIPID.P.0429 | 0.257 | 0.257 |
| <b>LIPID.P.0506</b> | LIPID.P.0430 | 0.382 | 0.382 |
| <b>LIPID.P.0506</b> | LIPID.P.0433 | 0.186 | 0.186 |
| <b>LIPID.P.0506</b> | LIPID.P.0436 | 0.273 | 0.273 |
| <b>LIPID.P.0506</b> | LIPID.P.0131 | 0.851 | 0.851 |
| <b>LIPID.P.0506</b> | MEDP0618     | 0.775 | 0.775 |
| <b>LIPID.P.0506</b> | MEDP1412     | 0.560 | 0.560 |
| <b>LIPID.P.0506</b> | MEDP1416     | 0.190 | 0.190 |
| <b>LIPID.P.0506</b> | MEDP1433     | 0.854 | 0.854 |
| <b>LIPID.P.0506</b> | MEDP1917     | 0.616 | 0.616 |
| <b>LIPID.P.0506</b> | LIPID.P.0047 | 0.462 | 0.462 |
| <b>LIPID.P.0506</b> | LIPID.P.0628 | 0.002 | 0.002 |
| <b>LIPID.P.0506</b> | LIPID.P.0153 | 0.159 | 0.159 |
| <b>LIPID.P.0550</b> | IVS          | 0.520 | 0.520 |
| <b>LIPID.P.0495</b> | IVS          | 0.548 | 0.548 |
| <b>LIPID.P.0628</b> | IVS          | 0.629 | 0.629 |
| <b>LIPID.P.0508</b> | LIPID.P.0521 | 0.981 | 0.981 |
| <b>LIPID.P.0508</b> | LIPID.N.0413 | 0.445 | 0.445 |
| <b>LIPID.P.0508</b> | LIPID.N.0426 | 0.556 | 0.556 |
| <b>LIPID.P.0508</b> | LIPID.P.0759 | 0.975 | 0.975 |
| <b>LIPID.P.0508</b> | MEDP1686     | 0.801 | 0.801 |
| <b>LIPID.P.0508</b> | MEDP1697     | 0.035 | 0.035 |
| <b>LIPID.P.0508</b> | MEDP1779     | 0.244 | 0.244 |
| <b>LIPID.P.0508</b> | LIPID.P.0351 | 0.862 | 0.862 |
| <b>LIPID.P.0508</b> | LIPID.P.0352 | 0.904 | 0.904 |
| <b>LIPID.P.0508</b> | LIPID.P.0355 | 0.914 | 0.914 |
| <b>LIPID.P.0508</b> | LIPID.P.0387 | 0.081 | 0.081 |
| <b>LIPID.P.0508</b> | LIPID.P.0388 | 0.086 | 0.086 |

|                     |              |       |       |
|---------------------|--------------|-------|-------|
| <b>LIPID.P.0508</b> | MEDN1264     | 0.404 | 0.404 |
| <b>LIPID.P.0508</b> | MEDN1267     | 0.345 | 0.345 |
| <b>LIPID.P.0508</b> | MEDN1269     | 0.713 | 0.713 |
| <b>LIPID.P.0508</b> | MEDN1287     | 0.041 | 0.041 |
| <b>LIPID.P.0508</b> | MEDP1875     | 0.191 | 0.191 |
| <b>LIPID.P.0508</b> | LIPID.N.0161 | 0.162 | 0.162 |
| <b>LIPID.P.0508</b> | LIPID.N.0165 | 0.472 | 0.472 |
| <b>LIPID.P.0508</b> | LIPID.P.0429 | 0.215 | 0.215 |
| <b>LIPID.P.0508</b> | LIPID.P.0430 | 0.291 | 0.291 |
| <b>LIPID.P.0508</b> | LIPID.P.0433 | 0.130 | 0.130 |
| <b>LIPID.P.0508</b> | LIPID.P.0436 | 0.201 | 0.201 |
| <b>LIPID.P.0508</b> | LIPID.P.0131 | 0.796 | 0.796 |
| <b>LIPID.P.0508</b> | MEDP0618     | 0.757 | 0.757 |
| <b>LIPID.P.0508</b> | MEDP1412     | 0.551 | 0.551 |
| <b>LIPID.P.0508</b> | MEDP1416     | 0.147 | 0.147 |
| <b>LIPID.P.0508</b> | MEDP1433     | 0.833 | 0.833 |
| <b>LIPID.P.0508</b> | MEDP1917     | 0.588 | 0.588 |
| <b>LIPID.P.0508</b> | LIPID.P.0047 | 0.429 | 0.429 |
| <b>LIPID.P.0508</b> | LIPID.P.0628 | 0.067 | 0.067 |
| <b>LIPID.P.0508</b> | LIPID.P.0153 | 0.186 | 0.186 |
| <b>RVOTd</b>        | IVS          | 0.678 | 0.678 |
| <b>RVAW</b>         | IVS          | 0.877 | 0.877 |
| <b>LIPID.N.0276</b> | McGoon       | 0.124 | 0.124 |
| <b>LIPID.P.0521</b> | LIPID.N.0413 | 0.380 | 0.380 |
| <b>LIPID.P.0521</b> | LIPID.N.0426 | 0.507 | 0.507 |
| <b>LIPID.P.0521</b> | LIPID.P.0759 | 0.977 | 0.977 |
| <b>LIPID.P.0521</b> | MEDP1686     | 0.771 | 0.771 |
| <b>LIPID.P.0521</b> | MEDP1697     | 0.008 | 0.008 |
| <b>LIPID.P.0521</b> | MEDP1779     | 0.273 | 0.273 |
| <b>LIPID.P.0521</b> | LIPID.P.0351 | 0.851 | 0.851 |
| <b>LIPID.P.0521</b> | LIPID.P.0352 | 0.897 | 0.897 |
| <b>LIPID.P.0521</b> | LIPID.P.0355 | 0.884 | 0.884 |
| <b>LIPID.P.0521</b> | LIPID.P.0387 | 0.052 | 0.052 |
| <b>LIPID.P.0521</b> | LIPID.P.0388 | 0.056 | 0.056 |
| <b>LIPID.P.0521</b> | MEDN1264     | 0.365 | 0.365 |
| <b>LIPID.P.0521</b> | MEDN1267     | 0.319 | 0.319 |
| <b>LIPID.P.0521</b> | MEDN1269     | 0.723 | 0.723 |
| <b>LIPID.P.0521</b> | MEDN1287     | 0.010 | 0.010 |
| <b>LIPID.P.0521</b> | MEDP1875     | 0.115 | 0.115 |
| <b>LIPID.P.0521</b> | LIPID.N.0161 | 0.118 | 0.118 |
| <b>LIPID.P.0521</b> | LIPID.N.0165 | 0.460 | 0.460 |
| <b>LIPID.P.0521</b> | LIPID.P.0429 | 0.164 | 0.164 |
| <b>LIPID.P.0521</b> | LIPID.P.0430 | 0.225 | 0.225 |



|                     |              |       |       |
|---------------------|--------------|-------|-------|
| <b>LIPID.P.0521</b> | LIPID.P.0433 | 0.060 | 0.060 |
| <b>LIPID.P.0521</b> | LIPID.P.0436 | 0.153 | 0.153 |
| <b>LIPID.P.0521</b> | LIPID.P.0131 | 0.753 | 0.753 |
| <b>LIPID.P.0521</b> | MEDP0618     | 0.774 | 0.774 |
| <b>LIPID.P.0521</b> | MEDP1412     | 0.514 | 0.514 |
| <b>LIPID.P.0521</b> | MEDP1416     | 0.119 | 0.119 |
| <b>LIPID.P.0521</b> | MEDP1433     | 0.837 | 0.837 |
| <b>LIPID.P.0521</b> | MEDP1917     | 0.636 | 0.636 |
| <b>LIPID.P.0521</b> | LIPID.P.0047 | 0.451 | 0.451 |
| <b>LIPID.P.0521</b> | LIPID.P.0628 | 0.078 | 0.078 |
| <b>LIPID.P.0521</b> | LIPID.P.0153 | 0.068 | 0.068 |
| <b>EF</b>           | McGoon       | 0.133 | 0.133 |
| <b>RVOT</b>         | McGoon       | 0.258 | 0.258 |
| <b>LIPID.N.0250</b> | McGoon       | 0.282 | 0.282 |
| <b>LIPID.N.0413</b> | LIPID.N.0426 | 0.501 | 0.501 |
| <b>LIPID.N.0413</b> | LIPID.P.0759 | 0.431 | 0.431 |
| <b>LIPID.N.0413</b> | MEDP1686     | 0.331 | 0.331 |
| <b>LIPID.N.0413</b> | MEDP1697     | 0.250 | 0.250 |
| <b>LIPID.N.0413</b> | MEDP1699     | 0.710 | 0.710 |
| <b>LIPID.N.0413</b> | MEDP1779     | 0.129 | 0.129 |
| <b>LIPID.N.0413</b> | LIPID.N.0119 | 0.776 | 0.776 |
| <b>LIPID.N.0413</b> | LIPID.N.0132 | 0.715 | 0.715 |
| <b>LIPID.N.0413</b> | LIPID.P.0351 | 0.423 | 0.423 |
| <b>LIPID.N.0413</b> | LIPID.P.0352 | 0.467 | 0.467 |
| <b>LIPID.N.0413</b> | LIPID.P.0355 | 0.511 | 0.511 |
| <b>LIPID.N.0413</b> | LIPID.P.0387 | 0.633 | 0.633 |
| <b>LIPID.N.0413</b> | LIPID.P.0388 | 0.664 | 0.664 |
| <b>LIPID.N.0413</b> | LIPID.P.0391 | 0.666 | 0.666 |
| <b>LIPID.N.0413</b> | MEDN1264     | 0.619 | 0.619 |
| <b>LIPID.N.0413</b> | MEDN1267     | 0.529 | 0.529 |
| <b>LIPID.N.0413</b> | MEDN1269     | 0.273 | 0.273 |
| <b>LIPID.N.0413</b> | MEDN1287     | 0.566 | 0.566 |
| <b>LIPID.N.0413</b> | MEDP1875     | 0.451 | 0.451 |
| <b>LIPID.N.0413</b> | LIPID.N.0161 | 0.770 | 0.770 |
| <b>LIPID.N.0413</b> | LIPID.N.0165 | 0.736 | 0.736 |
| <b>LIPID.N.0413</b> | LIPID.P.0429 | 0.667 | 0.667 |
| <b>LIPID.N.0413</b> | LIPID.P.0430 | 0.800 | 0.800 |
| <b>LIPID.N.0413</b> | LIPID.P.0433 | 0.784 | 0.784 |
| <b>LIPID.N.0413</b> | LIPID.P.0436 | 0.796 | 0.796 |
| <b>LIPID.N.0413</b> | LIPID.P.0131 | 0.663 | 0.663 |
| <b>LIPID.N.0413</b> | MEDP0618     | 0.175 | 0.175 |
| <b>LIPID.N.0413</b> | MEDP1412     | 0.012 | 0.012 |
| <b>LIPID.N.0413</b> | MEDP1433     | 0.204 | 0.204 |

|                     |              |       |       |
|---------------------|--------------|-------|-------|
| <b>LIPID.N.0413</b> | MEDP1917     | 0.051 | 0.051 |
| <b>LIPID.N.0413</b> | LIPID.P.0153 | 0.486 | 0.486 |
| <b>LIPID.P.0521</b> | McGoon       | 0.284 | 0.284 |
| <b>LIPID.P.0508</b> | McGoon       | 0.301 | 0.301 |
| <b>LIPID.N.0229</b> | McGoon       | 0.307 | 0.307 |
| <b>LIPID.N.0413</b> | McGoon       | 0.309 | 0.309 |
| <b>LIPID.N.0426</b> | LIPID.P.0759 | 0.638 | 0.638 |
| <b>LIPID.N.0426</b> | MEDP1686     | 0.760 | 0.760 |
| <b>LIPID.N.0426</b> | MEDP1697     | 0.674 | 0.674 |
| <b>LIPID.N.0426</b> | MEDP1699     | 0.386 | 0.386 |
| <b>LIPID.N.0426</b> | MEDP1779     | 0.576 | 0.576 |
| <b>LIPID.N.0426</b> | LIPID.N.0119 | 0.352 | 0.352 |
| <b>LIPID.N.0426</b> | LIPID.N.0132 | 0.357 | 0.357 |
| <b>LIPID.N.0426</b> | LIPID.P.0351 | 0.809 | 0.809 |
| <b>LIPID.N.0426</b> | LIPID.P.0352 | 0.736 | 0.736 |
| <b>LIPID.N.0426</b> | LIPID.P.0355 | 0.734 | 0.734 |
| <b>LIPID.N.0426</b> | LIPID.P.0387 | 0.415 | 0.415 |
| <b>LIPID.N.0426</b> | LIPID.P.0388 | 0.378 | 0.378 |
| <b>LIPID.N.0426</b> | LIPID.P.0391 | 0.360 | 0.360 |
| <b>LIPID.N.0426</b> | MEDN1264     | 0.545 | 0.545 |
| <b>LIPID.N.0426</b> | MEDN1267     | 0.619 | 0.619 |
| <b>LIPID.N.0426</b> | MEDN1269     | 0.599 | 0.599 |
| <b>LIPID.N.0426</b> | MEDN1287     | 0.496 | 0.496 |
| <b>LIPID.N.0426</b> | MEDP1875     | 0.517 | 0.517 |
| <b>LIPID.N.0426</b> | LIPID.N.0161 | 0.509 | 0.509 |
| <b>LIPID.N.0426</b> | LIPID.N.0165 | 0.595 | 0.595 |
| <b>LIPID.N.0426</b> | LIPID.P.0429 | 0.407 | 0.407 |
| <b>LIPID.N.0426</b> | LIPID.P.0430 | 0.527 | 0.527 |
| <b>LIPID.N.0426</b> | LIPID.P.0433 | 0.421 | 0.421 |
| <b>LIPID.N.0426</b> | LIPID.P.0436 | 0.534 | 0.534 |
| <b>LIPID.N.0426</b> | LIPID.P.0131 | 0.520 | 0.520 |
| <b>LIPID.N.0426</b> | MEDP0618     | 0.777 | 0.777 |
| <b>LIPID.N.0426</b> | MEDP1412     | 0.777 | 0.777 |
| <b>LIPID.N.0426</b> | MEDP1416     | 0.646 | 0.646 |
| <b>LIPID.N.0426</b> | MEDP1433     | 0.733 | 0.733 |
| <b>LIPID.N.0426</b> | MEDP1917     | 0.581 | 0.581 |
| <b>LIPID.N.0426</b> | LIPID.P.0047 | 0.568 | 0.568 |
| <b>LIPID.N.0426</b> | LIPID.P.0153 | 0.015 | 0.015 |
| <b>LIPID.P.0491</b> | McGoon       | 0.320 | 0.320 |
| <b>LIPID.P.0131</b> | McGoon       | 0.363 | 0.363 |
| <b>LIPID.P.0481</b> | McGoon       | 0.363 | 0.363 |
| <b>LIPID.P.0506</b> | McGoon       | 0.379 | 0.379 |
| <b>LIPID.P.0759</b> | MEDP1686     | 0.815 | 0.815 |

|                     |              |       |       |
|---------------------|--------------|-------|-------|
| <b>LIPID.P.0759</b> | MEDP1697     | 0.082 | 0.082 |
| <b>LIPID.P.0759</b> | MEDP1779     | 0.303 | 0.303 |
| <b>LIPID.P.0759</b> | LIPID.P.0351 | 0.889 | 0.889 |
| <b>LIPID.P.0759</b> | LIPID.P.0352 | 0.913 | 0.913 |
| <b>LIPID.P.0759</b> | LIPID.P.0355 | 0.910 | 0.910 |
| <b>LIPID.P.0759</b> | LIPID.P.0387 | 0.119 | 0.119 |
| <b>LIPID.P.0759</b> | LIPID.P.0388 | 0.109 | 0.109 |
| <b>LIPID.P.0759</b> | LIPID.P.0391 | 0.024 | 0.024 |
| <b>LIPID.P.0759</b> | MEDN1264     | 0.428 | 0.428 |
| <b>LIPID.P.0759</b> | MEDN1267     | 0.397 | 0.397 |
| <b>LIPID.P.0759</b> | MEDN1269     | 0.767 | 0.767 |
| <b>LIPID.P.0759</b> | MEDN1287     | 0.084 | 0.084 |
| <b>LIPID.P.0759</b> | MEDP1875     | 0.197 | 0.197 |
| <b>LIPID.P.0759</b> | LIPID.N.0161 | 0.185 | 0.185 |
| <b>LIPID.P.0759</b> | LIPID.N.0165 | 0.515 | 0.515 |
| <b>LIPID.P.0759</b> | LIPID.P.0429 | 0.231 | 0.231 |
| <b>LIPID.P.0759</b> | LIPID.P.0430 | 0.280 | 0.280 |
| <b>LIPID.P.0759</b> | LIPID.P.0433 | 0.134 | 0.134 |
| <b>LIPID.P.0759</b> | LIPID.P.0436 | 0.230 | 0.230 |
| <b>LIPID.P.0759</b> | LIPID.P.0131 | 0.756 | 0.756 |
| <b>LIPID.P.0759</b> | MEDP0618     | 0.834 | 0.834 |
| <b>LIPID.P.0759</b> | MEDP1412     | 0.603 | 0.603 |
| <b>LIPID.P.0759</b> | MEDP1416     | 0.217 | 0.217 |
| <b>LIPID.P.0759</b> | MEDP1433     | 0.873 | 0.873 |
| <b>LIPID.P.0759</b> | MEDP1917     | 0.703 | 0.703 |
| <b>LIPID.P.0759</b> | LIPID.P.0047 | 0.558 | 0.558 |
| <b>LIPID.P.0759</b> | LIPID.P.0628 | 0.027 | 0.027 |
| <b>LIPID.P.0759</b> | LIPID.P.0153 | 0.096 | 0.096 |
| <b>LIPID.P.0759</b> | McGoon       | 0.386 | 0.386 |
| <b>LIPID.N.0119</b> | McGoon       | 0.413 | 0.413 |
| <b>LIPID.N.0132</b> | McGoon       | 0.490 | 0.490 |
| <b>MEDP1686</b>     | MEDP1697     | 0.518 | 0.518 |
| <b>MEDP1686</b>     | MEDP1699     | 0.053 | 0.053 |
| <b>MEDP1686</b>     | MEDP1779     | 0.600 | 0.600 |
| <b>MEDP1686</b>     | LIPID.N.0119 | 0.067 | 0.067 |
| <b>MEDP1686</b>     | LIPID.N.0132 | 0.017 | 0.017 |
| <b>MEDP1686</b>     | LIPID.P.0351 | 0.957 | 0.957 |
| <b>MEDP1686</b>     | LIPID.P.0352 | 0.931 | 0.931 |
| <b>MEDP1686</b>     | LIPID.P.0355 | 0.938 | 0.938 |
| <b>MEDP1686</b>     | LIPID.P.0387 | 0.176 | 0.176 |
| <b>MEDP1686</b>     | LIPID.P.0388 | 0.146 | 0.146 |
| <b>MEDP1686</b>     | LIPID.P.0391 | 0.086 | 0.086 |
| <b>MEDP1686</b>     | MEDN1264     | 0.482 | 0.482 |

|                     |              |       |       |
|---------------------|--------------|-------|-------|
| <b>MEDP1686</b>     | MEDN1267     | 0.510 | 0.510 |
| <b>MEDP1686</b>     | MEDN1269     | 0.805 | 0.805 |
| <b>MEDP1686</b>     | MEDN1287     | 0.241 | 0.241 |
| <b>MEDP1686</b>     | MEDP1875     | 0.458 | 0.458 |
| <b>MEDP1686</b>     | LIPID.N.0161 | 0.329 | 0.329 |
| <b>MEDP1686</b>     | LIPID.N.0165 | 0.569 | 0.569 |
| <b>MEDP1686</b>     | LIPID.P.0429 | 0.256 | 0.256 |
| <b>MEDP1686</b>     | LIPID.P.0430 | 0.408 | 0.408 |
| <b>MEDP1686</b>     | LIPID.P.0433 | 0.180 | 0.180 |
| <b>MEDP1686</b>     | LIPID.P.0436 | 0.264 | 0.264 |
| <b>MEDP1686</b>     | LIPID.P.0131 | 0.722 | 0.722 |
| <b>MEDP1686</b>     | MEDP0618     | 0.889 | 0.889 |
| <b>MEDP1686</b>     | MEDP1412     | 0.870 | 0.870 |
| <b>MEDP1686</b>     | MEDP1416     | 0.665 | 0.665 |
| <b>MEDP1686</b>     | MEDP1433     | 0.953 | 0.953 |
| <b>MEDP1686</b>     | MEDP1917     | 0.798 | 0.798 |
| <b>MEDP1686</b>     | LIPID.P.0047 | 0.735 | 0.735 |
| <b>MEDP1686</b>     | LIPID.P.0153 | 0.044 | 0.044 |
| <b>MEDP1917</b>     | McGoon       | 0.505 | 0.505 |
| <b>LIPID.P.0433</b> | McGoon       | 0.513 | 0.513 |
| <b>LIPID.P.0047</b> | McGoon       | 0.516 | 0.516 |
| <b>MEDP1697</b>     | MEDP1699     | 0.570 | 0.570 |
| <b>MEDP1697</b>     | MEDP1779     | 0.719 | 0.719 |
| <b>MEDP1697</b>     | LIPID.N.0119 | 0.561 | 0.561 |
| <b>MEDP1697</b>     | LIPID.N.0132 | 0.590 | 0.590 |
| <b>MEDP1697</b>     | LIPID.P.0351 | 0.484 | 0.484 |
| <b>MEDP1697</b>     | LIPID.P.0352 | 0.386 | 0.386 |
| <b>MEDP1697</b>     | LIPID.P.0355 | 0.351 | 0.351 |
| <b>MEDP1697</b>     | LIPID.P.0387 | 0.523 | 0.523 |
| <b>MEDP1697</b>     | LIPID.P.0388 | 0.496 | 0.496 |
| <b>MEDP1697</b>     | LIPID.P.0391 | 0.519 | 0.519 |
| <b>MEDP1697</b>     | MEDN1264     | 0.470 | 0.470 |
| <b>MEDP1697</b>     | MEDN1267     | 0.593 | 0.593 |
| <b>MEDP1697</b>     | MEDN1269     | 0.397 | 0.397 |
| <b>MEDP1697</b>     | MEDN1287     | 0.647 | 0.647 |
| <b>MEDP1697</b>     | MEDP1875     | 0.588 | 0.588 |
| <b>MEDP1697</b>     | LIPID.N.0161 | 0.656 | 0.656 |
| <b>MEDP1697</b>     | LIPID.N.0165 | 0.568 | 0.568 |
| <b>MEDP1697</b>     | LIPID.P.0429 | 0.403 | 0.403 |
| <b>MEDP1697</b>     | LIPID.P.0430 | 0.598 | 0.598 |
| <b>MEDP1697</b>     | LIPID.P.0433 | 0.421 | 0.421 |
| <b>MEDP1697</b>     | LIPID.P.0436 | 0.518 | 0.518 |
| <b>MEDP1697</b>     | LIPID.P.0131 | 0.264 | 0.264 |

|                     |              |       |       |
|---------------------|--------------|-------|-------|
| <b>MEDP1697</b>     | MEDP0618     | 0.403 | 0.403 |
| <b>MEDP1697</b>     | MEDP1412     | 0.581 | 0.581 |
| <b>MEDP1697</b>     | MEDP1416     | 0.755 | 0.755 |
| <b>MEDP1697</b>     | MEDP1433     | 0.428 | 0.428 |
| <b>MEDP1697</b>     | MEDP1917     | 0.323 | 0.323 |
| <b>MEDP1697</b>     | LIPID.P.0047 | 0.364 | 0.364 |
| <b>MEDP1699</b>     | McGoon       | 0.540 | 0.540 |
| <b>LIPID.P.0355</b> | McGoon       | 0.549 | 0.549 |
| <b>LIPID.P.0391</b> | McGoon       | 0.550 | 0.550 |
| <b>LIPID.P.0429</b> | McGoon       | 0.566 | 0.566 |
| <b>MEDP1699</b>     | MEDP1779     | 0.177 | 0.177 |
| <b>MEDP1699</b>     | LIPID.N.0119 | 0.906 | 0.906 |
| <b>MEDP1699</b>     | LIPID.N.0132 | 0.954 | 0.954 |
| <b>MEDP1699</b>     | LIPID.P.0351 | 0.156 | 0.156 |
| <b>MEDP1699</b>     | LIPID.P.0352 | 0.142 | 0.142 |
| <b>MEDP1699</b>     | LIPID.P.0355 | 0.143 | 0.143 |
| <b>MEDP1699</b>     | LIPID.P.0387 | 0.913 | 0.913 |
| <b>MEDP1699</b>     | LIPID.P.0388 | 0.925 | 0.925 |
| <b>MEDP1699</b>     | LIPID.P.0391 | 0.937 | 0.937 |
| <b>MEDP1699</b>     | MEDN1264     | 0.732 | 0.732 |
| <b>MEDP1699</b>     | MEDN1267     | 0.717 | 0.717 |
| <b>MEDP1699</b>     | MEDN1269     | 0.165 | 0.165 |
| <b>MEDP1699</b>     | MEDN1287     | 0.915 | 0.915 |
| <b>MEDP1699</b>     | MEDP1875     | 0.693 | 0.693 |
| <b>MEDP1699</b>     | LIPID.N.0161 | 0.883 | 0.883 |
| <b>MEDP1699</b>     | LIPID.N.0165 | 0.632 | 0.632 |
| <b>MEDP1699</b>     | LIPID.P.0429 | 0.841 | 0.841 |
| <b>MEDP1699</b>     | LIPID.P.0430 | 0.879 | 0.879 |
| <b>MEDP1699</b>     | LIPID.P.0433 | 0.927 | 0.927 |
| <b>MEDP1699</b>     | LIPID.P.0436 | 0.936 | 0.936 |
| <b>MEDP1699</b>     | LIPID.P.0131 | 0.331 | 0.331 |
| <b>MEDP1699</b>     | LIPID.P.0153 | 0.160 | 0.160 |
| <b>LIPID.P.0388</b> | McGoon       | 0.570 | 0.570 |
| <b>LIPID.P.0352</b> | McGoon       | 0.582 | 0.582 |
| <b>LIPID.P.0430</b> | McGoon       | 0.600 | 0.600 |
| <b>MEDP1433</b>     | McGoon       | 0.613 | 0.613 |
| <b>MEDP1779</b>     | LIPID.N.0119 | 0.232 | 0.232 |
| <b>MEDP1779</b>     | LIPID.N.0132 | 0.182 | 0.182 |
| <b>MEDP1779</b>     | LIPID.P.0351 | 0.516 | 0.516 |
| <b>MEDP1779</b>     | LIPID.P.0352 | 0.434 | 0.434 |
| <b>MEDP1779</b>     | LIPID.P.0355 | 0.389 | 0.389 |
| <b>MEDP1779</b>     | LIPID.P.0387 | 0.156 | 0.156 |
| <b>MEDP1779</b>     | LIPID.P.0388 | 0.097 | 0.097 |

|                     |              |       |       |
|---------------------|--------------|-------|-------|
| <b>MEDP1779</b>     | LIPID.P.0391 | 0.129 | 0.129 |
| <b>MEDP1779</b>     | MEDN1264     | 0.292 | 0.292 |
| <b>MEDP1779</b>     | MEDN1267     | 0.419 | 0.419 |
| <b>MEDP1779</b>     | MEDN1269     | 0.477 | 0.477 |
| <b>MEDP1779</b>     | MEDN1287     | 0.316 | 0.316 |
| <b>MEDP1779</b>     | MEDP1875     | 0.319 | 0.319 |
| <b>MEDP1779</b>     | LIPID.N.0161 | 0.339 | 0.339 |
| <b>MEDP1779</b>     | LIPID.N.0165 | 0.451 | 0.451 |
| <b>MEDP1779</b>     | LIPID.P.0429 | 0.093 | 0.093 |
| <b>MEDP1779</b>     | LIPID.P.0430 | 0.205 | 0.205 |
| <b>MEDP1779</b>     | LIPID.P.0433 | 0.090 | 0.090 |
| <b>MEDP1779</b>     | LIPID.P.0436 | 0.205 | 0.205 |
| <b>MEDP1779</b>     | LIPID.P.0131 | 0.123 | 0.123 |
| <b>MEDP1779</b>     | MEDP0618     | 0.672 | 0.672 |
| <b>MEDP1779</b>     | MEDP1412     | 0.667 | 0.667 |
| <b>MEDP1779</b>     | MEDP1416     | 0.736 | 0.736 |
| <b>MEDP1779</b>     | MEDP1433     | 0.593 | 0.593 |
| <b>MEDP1779</b>     | MEDP1917     | 0.599 | 0.599 |
| <b>MEDP1779</b>     | LIPID.P.0047 | 0.477 | 0.477 |
| <b>LIPID.P.0387</b> | McGoon       | 0.625 | 0.625 |
| <b>LIPID.P.0436</b> | McGoon       | 0.627 | 0.627 |
| <b>MEDP0618</b>     | McGoon       | 0.628 | 0.628 |
| <b>LIPID.N.0161</b> | McGoon       | 0.629 | 0.629 |
| <b>LIPID.N.0119</b> | LIPID.N.0132 | 0.951 | 0.951 |
| <b>LIPID.N.0119</b> | LIPID.P.0351 | 0.116 | 0.116 |
| <b>LIPID.N.0119</b> | LIPID.P.0352 | 0.108 | 0.108 |
| <b>LIPID.N.0119</b> | LIPID.P.0355 | 0.125 | 0.125 |
| <b>LIPID.N.0119</b> | LIPID.P.0387 | 0.740 | 0.740 |
| <b>LIPID.N.0119</b> | LIPID.P.0388 | 0.765 | 0.765 |
| <b>LIPID.N.0119</b> | LIPID.P.0391 | 0.834 | 0.834 |
| <b>LIPID.N.0119</b> | MEDN1264     | 0.529 | 0.529 |
| <b>LIPID.N.0119</b> | MEDN1267     | 0.509 | 0.509 |
| <b>LIPID.N.0119</b> | MEDN1269     | 0.024 | 0.024 |
| <b>LIPID.N.0119</b> | MEDN1287     | 0.733 | 0.733 |
| <b>LIPID.N.0119</b> | MEDP1875     | 0.515 | 0.515 |
| <b>LIPID.N.0119</b> | LIPID.N.0161 | 0.897 | 0.897 |
| <b>LIPID.N.0119</b> | LIPID.N.0165 | 0.671 | 0.671 |
| <b>LIPID.N.0119</b> | LIPID.P.0429 | 0.649 | 0.649 |
| <b>LIPID.N.0119</b> | LIPID.P.0430 | 0.830 | 0.830 |
| <b>LIPID.N.0119</b> | LIPID.P.0433 | 0.805 | 0.805 |
| <b>LIPID.N.0119</b> | LIPID.P.0436 | 0.817 | 0.817 |
| <b>LIPID.N.0119</b> | LIPID.P.0131 | 0.341 | 0.341 |
| <b>LIPID.N.0119</b> | MEDP1416     | 0.015 | 0.015 |

|                     |              |       |       |
|---------------------|--------------|-------|-------|
| <b>LIPID.N.0119</b> | LIPID.P.0153 | 0.212 | 0.212 |
| <b>LIPID.N.0165</b> | McGoon       | 0.643 | 0.643 |
| <b>LIPID.P.0480</b> | McGoon       | 0.651 | 0.651 |
| <b>Pre_SPO2</b>     | McGoon       | 0.654 | 0.654 |
| <b>MEDP1686</b>     | McGoon       | 0.665 | 0.665 |
| <b>LIPID.N.0132</b> | LIPID.P.0351 | 0.090 | 0.090 |
| <b>LIPID.N.0132</b> | LIPID.P.0352 | 0.065 | 0.065 |
| <b>LIPID.N.0132</b> | LIPID.P.0355 | 0.074 | 0.074 |
| <b>LIPID.N.0132</b> | LIPID.P.0387 | 0.865 | 0.865 |
| <b>LIPID.N.0132</b> | LIPID.P.0388 | 0.884 | 0.884 |
| <b>LIPID.N.0132</b> | LIPID.P.0391 | 0.935 | 0.935 |
| <b>LIPID.N.0132</b> | MEDN1264     | 0.628 | 0.628 |
| <b>LIPID.N.0132</b> | MEDN1267     | 0.626 | 0.626 |
| <b>LIPID.N.0132</b> | MEDN1269     | 0.115 | 0.115 |
| <b>LIPID.N.0132</b> | MEDN1287     | 0.823 | 0.823 |
| <b>LIPID.N.0132</b> | MEDP1875     | 0.562 | 0.562 |
| <b>LIPID.N.0132</b> | LIPID.N.0161 | 0.928 | 0.928 |
| <b>LIPID.N.0132</b> | LIPID.N.0165 | 0.702 | 0.702 |
| <b>LIPID.N.0132</b> | LIPID.P.0429 | 0.754 | 0.754 |
| <b>LIPID.N.0132</b> | LIPID.P.0430 | 0.854 | 0.854 |
| <b>LIPID.N.0132</b> | LIPID.P.0433 | 0.859 | 0.859 |
| <b>LIPID.N.0132</b> | LIPID.P.0436 | 0.887 | 0.887 |
| <b>LIPID.N.0132</b> | LIPID.P.0131 | 0.289 | 0.289 |
| <b>LIPID.N.0132</b> | LIPID.P.0153 | 0.069 | 0.069 |
| <b>LIPID.P.0351</b> | McGoon       | 0.682 | 0.682 |
| <b>MEDN1269</b>     | McGoon       | 0.690 | 0.690 |
| <b>MEDP1412</b>     | McGoon       | 0.696 | 0.696 |
| <b>MEDN1264</b>     | McGoon       | 0.702 | 0.702 |
| <b>LIPID.P.0351</b> | LIPID.P.0352 | 0.987 | 0.987 |
| <b>LIPID.P.0351</b> | LIPID.P.0355 | 0.974 | 0.974 |
| <b>LIPID.P.0351</b> | LIPID.P.0387 | 0.281 | 0.281 |
| <b>LIPID.P.0351</b> | LIPID.P.0388 | 0.265 | 0.265 |
| <b>LIPID.P.0351</b> | LIPID.P.0391 | 0.191 | 0.191 |
| <b>LIPID.P.0351</b> | MEDN1264     | 0.548 | 0.548 |
| <b>LIPID.P.0351</b> | MEDN1267     | 0.566 | 0.566 |
| <b>LIPID.P.0351</b> | MEDN1269     | 0.816 | 0.816 |
| <b>LIPID.P.0351</b> | MEDN1287     | 0.318 | 0.318 |
| <b>LIPID.P.0351</b> | MEDP1875     | 0.443 | 0.443 |
| <b>LIPID.P.0351</b> | LIPID.N.0161 | 0.381 | 0.381 |
| <b>LIPID.P.0351</b> | LIPID.N.0165 | 0.619 | 0.619 |
| <b>LIPID.P.0351</b> | LIPID.P.0429 | 0.340 | 0.340 |
| <b>LIPID.P.0351</b> | LIPID.P.0430 | 0.479 | 0.479 |
| <b>LIPID.P.0351</b> | LIPID.P.0433 | 0.261 | 0.261 |

|                     |              |       |       |
|---------------------|--------------|-------|-------|
| <b>LIPID.P.0351</b> | LIPID.P.0436 | 0.371 | 0.371 |
| <b>LIPID.P.0351</b> | LIPID.P.0131 | 0.793 | 0.793 |
| <b>LIPID.P.0351</b> | MEDP0618     | 0.880 | 0.880 |
| <b>LIPID.P.0351</b> | MEDP1412     | 0.782 | 0.782 |
| <b>LIPID.P.0351</b> | MEDP1416     | 0.525 | 0.525 |
| <b>LIPID.P.0351</b> | MEDP1433     | 0.944 | 0.944 |
| <b>LIPID.P.0351</b> | MEDP1917     | 0.736 | 0.736 |
| <b>LIPID.P.0351</b> | LIPID.P.0047 | 0.640 | 0.640 |
| <b>LIPID.P.0351</b> | LIPID.P.0153 | 0.010 | 0.010 |
| <b>MEDP1875</b>     | McGoon       | 0.711 | 0.711 |
| <b>MEDP1779</b>     | McGoon       | 0.724 | 0.724 |
| <b>MEDP1416</b>     | McGoon       | 0.726 | 0.726 |
| <b>LIPID.P.0352</b> | LIPID.P.0355 | 0.988 | 0.988 |
| <b>LIPID.P.0352</b> | LIPID.P.0387 | 0.256 | 0.256 |
| <b>LIPID.P.0352</b> | LIPID.P.0388 | 0.253 | 0.253 |
| <b>LIPID.P.0352</b> | LIPID.P.0391 | 0.167 | 0.167 |
| <b>LIPID.P.0352</b> | MEDN1264     | 0.528 | 0.528 |
| <b>LIPID.P.0352</b> | MEDN1267     | 0.518 | 0.518 |
| <b>LIPID.P.0352</b> | MEDN1269     | 0.782 | 0.782 |
| <b>LIPID.P.0352</b> | MEDN1287     | 0.276 | 0.276 |
| <b>LIPID.P.0352</b> | MEDP1875     | 0.401 | 0.401 |
| <b>LIPID.P.0352</b> | LIPID.N.0161 | 0.354 | 0.354 |
| <b>LIPID.P.0352</b> | LIPID.N.0165 | 0.599 | 0.599 |
| <b>LIPID.P.0352</b> | LIPID.P.0429 | 0.334 | 0.334 |
| <b>LIPID.P.0352</b> | LIPID.P.0430 | 0.479 | 0.479 |
| <b>LIPID.P.0352</b> | LIPID.P.0433 | 0.259 | 0.259 |
| <b>LIPID.P.0352</b> | LIPID.P.0436 | 0.356 | 0.356 |
| <b>LIPID.P.0352</b> | LIPID.P.0131 | 0.845 | 0.845 |
| <b>LIPID.P.0352</b> | MEDP0618     | 0.835 | 0.835 |
| <b>LIPID.P.0352</b> | MEDP1412     | 0.698 | 0.698 |
| <b>LIPID.P.0352</b> | MEDP1416     | 0.406 | 0.406 |
| <b>LIPID.P.0352</b> | MEDP1433     | 0.916 | 0.916 |
| <b>LIPID.P.0352</b> | MEDP1917     | 0.688 | 0.688 |
| <b>LIPID.P.0352</b> | LIPID.P.0047 | 0.572 | 0.572 |
| <b>LIPID.P.0352</b> | LIPID.P.0153 | 0.087 | 0.087 |
| <b>MEDN1287</b>     | McGoon       | 0.735 | 0.735 |
| <b>MEDN1267</b>     | McGoon       | 0.817 | 0.817 |
| <b>LIPID.N.0426</b> | McGoon       | 0.842 | 0.842 |
| <b>LIPID.P.0355</b> | LIPID.P.0387 | 0.257 | 0.257 |
| <b>LIPID.P.0355</b> | LIPID.P.0388 | 0.252 | 0.252 |
| <b>LIPID.P.0355</b> | LIPID.P.0391 | 0.173 | 0.173 |
| <b>LIPID.P.0355</b> | MEDN1264     | 0.546 | 0.546 |
| <b>LIPID.P.0355</b> | MEDN1267     | 0.521 | 0.521 |



|                     |              |       |       |
|---------------------|--------------|-------|-------|
| <b>LIPID.P.0355</b> | MEDN1269     | 0.772 | 0.772 |
| <b>LIPID.P.0355</b> | MEDN1287     | 0.267 | 0.267 |
| <b>LIPID.P.0355</b> | MEDP1875     | 0.433 | 0.433 |
| <b>LIPID.P.0355</b> | LIPID.N.0161 | 0.368 | 0.368 |
| <b>LIPID.P.0355</b> | LIPID.N.0165 | 0.604 | 0.604 |
| <b>LIPID.P.0355</b> | LIPID.P.0429 | 0.357 | 0.357 |
| <b>LIPID.P.0355</b> | LIPID.P.0430 | 0.498 | 0.498 |
| <b>LIPID.P.0355</b> | LIPID.P.0433 | 0.297 | 0.297 |
| <b>LIPID.P.0355</b> | LIPID.P.0436 | 0.372 | 0.372 |
| <b>LIPID.P.0355</b> | LIPID.P.0131 | 0.860 | 0.860 |
| <b>LIPID.P.0355</b> | MEDP0618     | 0.808 | 0.808 |
| <b>LIPID.P.0355</b> | MEDP1412     | 0.695 | 0.695 |
| <b>LIPID.P.0355</b> | MEDP1416     | 0.395 | 0.395 |
| <b>LIPID.P.0355</b> | MEDP1433     | 0.893 | 0.893 |
| <b>LIPID.P.0355</b> | MEDP1917     | 0.666 | 0.666 |
| <b>LIPID.P.0355</b> | LIPID.P.0047 | 0.570 | 0.570 |
| <b>LIPID.P.0355</b> | LIPID.P.0153 | 0.196 | 0.196 |
| <b>MEDP1697</b>     | McGoon       | 0.882 | 0.882 |
| <b>LIPID.P.0153</b> | Pre_SPO2     | 0.181 | 0.181 |
| <b>LIPID.N.0229</b> | Pre_SPO2     | 0.200 | 0.200 |
| <b>LIPID.P.0387</b> | LIPID.P.0388 | 0.993 | 0.993 |
| <b>LIPID.P.0387</b> | LIPID.P.0391 | 0.972 | 0.972 |
| <b>LIPID.P.0387</b> | MEDN1264     | 0.898 | 0.898 |
| <b>LIPID.P.0387</b> | MEDN1267     | 0.889 | 0.889 |
| <b>LIPID.P.0387</b> | MEDN1269     | 0.466 | 0.466 |
| <b>LIPID.P.0387</b> | MEDN1287     | 0.954 | 0.954 |
| <b>LIPID.P.0387</b> | MEDP1875     | 0.771 | 0.771 |
| <b>LIPID.P.0387</b> | LIPID.N.0161 | 0.881 | 0.881 |
| <b>LIPID.P.0387</b> | LIPID.N.0165 | 0.739 | 0.739 |
| <b>LIPID.P.0387</b> | LIPID.P.0429 | 0.956 | 0.956 |
| <b>LIPID.P.0387</b> | LIPID.P.0430 | 0.877 | 0.877 |
| <b>LIPID.P.0387</b> | LIPID.P.0433 | 0.936 | 0.936 |
| <b>LIPID.P.0387</b> | LIPID.P.0436 | 0.965 | 0.965 |
| <b>LIPID.P.0387</b> | LIPID.P.0131 | 0.402 | 0.402 |
| <b>LIPID.P.0387</b> | MEDP1416     | 0.002 | 0.002 |
| <b>LIPID.P.0387</b> | MEDP1433     | 0.049 | 0.049 |
| <b>LIPID.P.0387</b> | LIPID.P.0153 | 0.037 | 0.037 |
| <b>LIPID.P.0521</b> | Pre_SPO2     | 0.308 | 0.308 |
| <b>LIPID.P.0481</b> | Pre_SPO2     | 0.319 | 0.319 |
| <b>LIPID.P.0506</b> | Pre_SPO2     | 0.403 | 0.403 |
| <b>MEDP1779</b>     | Pre_SPO2     | 0.404 | 0.404 |
| <b>LIPID.P.0388</b> | LIPID.P.0391 | 0.978 | 0.978 |
| <b>LIPID.P.0388</b> | MEDN1264     | 0.867 | 0.867 |

|                     |              |       |       |
|---------------------|--------------|-------|-------|
| <b>LIPID.P.0388</b> | MEDN1267     | 0.844 | 0.844 |
| <b>LIPID.P.0388</b> | MEDN1269     | 0.420 | 0.420 |
| <b>LIPID.P.0388</b> | MEDN1287     | 0.930 | 0.930 |
| <b>LIPID.P.0388</b> | MEDP1875     | 0.727 | 0.727 |
| <b>LIPID.P.0388</b> | LIPID.N.0161 | 0.889 | 0.889 |
| <b>LIPID.P.0388</b> | LIPID.N.0165 | 0.739 | 0.739 |
| <b>LIPID.P.0388</b> | LIPID.P.0429 | 0.945 | 0.945 |
| <b>LIPID.P.0388</b> | LIPID.P.0430 | 0.897 | 0.897 |
| <b>LIPID.P.0388</b> | LIPID.P.0433 | 0.934 | 0.934 |
| <b>LIPID.P.0388</b> | LIPID.P.0436 | 0.962 | 0.962 |
| <b>LIPID.P.0388</b> | LIPID.P.0131 | 0.440 | 0.440 |
| <b>LIPID.P.0388</b> | MEDP1433     | 0.022 | 0.022 |
| <b>LIPID.P.0388</b> | LIPID.P.0153 | 0.053 | 0.053 |
| <b>LIPID.P.0508</b> | Pre_SPO2     | 0.409 | 0.409 |
| <b>LIPID.P.0759</b> | Pre_SPO2     | 0.414 | 0.414 |
| <b>LIPID.N.0276</b> | Pre_SPO2     | 0.420 | 0.420 |
| <b>LIPID.P.0491</b> | Pre_SPO2     | 0.422 | 0.422 |
| <b>LIPID.P.0391</b> | MEDN1264     | 0.803 | 0.803 |
| <b>LIPID.P.0391</b> | MEDN1267     | 0.796 | 0.796 |
| <b>LIPID.P.0391</b> | MEDN1269     | 0.339 | 0.339 |
| <b>LIPID.P.0391</b> | MEDN1287     | 0.899 | 0.899 |
| <b>LIPID.P.0391</b> | MEDP1875     | 0.659 | 0.659 |
| <b>LIPID.P.0391</b> | LIPID.N.0161 | 0.925 | 0.925 |
| <b>LIPID.P.0391</b> | LIPID.N.0165 | 0.763 | 0.763 |
| <b>LIPID.P.0391</b> | LIPID.P.0429 | 0.885 | 0.885 |
| <b>LIPID.P.0391</b> | LIPID.P.0430 | 0.869 | 0.869 |
| <b>LIPID.P.0391</b> | LIPID.P.0433 | 0.912 | 0.912 |
| <b>LIPID.P.0391</b> | LIPID.P.0436 | 0.950 | 0.950 |
| <b>LIPID.P.0391</b> | LIPID.P.0131 | 0.351 | 0.351 |
| <b>LIPID.P.0391</b> | LIPID.P.0153 | 0.006 | 0.006 |
| <b>LIPID.N.0250</b> | Pre_SPO2     | 0.437 | 0.437 |
| <b>MEDP0618</b>     | Pre_SPO2     | 0.444 | 0.444 |
| <b>MEDP1699</b>     | Pre_SPO2     | 0.456 | 0.456 |
| <b>MEDP1917</b>     | Pre_SPO2     | 0.464 | 0.464 |
| <b>MEDN1264</b>     | MEDN1267     | 0.977 | 0.977 |
| <b>MEDN1264</b>     | MEDN1269     | 0.736 | 0.736 |
| <b>MEDN1264</b>     | MEDN1287     | 0.887 | 0.887 |
| <b>MEDN1264</b>     | MEDP1875     | 0.873 | 0.873 |
| <b>MEDN1264</b>     | LIPID.N.0161 | 0.768 | 0.768 |
| <b>MEDN1264</b>     | LIPID.N.0165 | 0.749 | 0.749 |
| <b>MEDN1264</b>     | LIPID.P.0429 | 0.948 | 0.948 |
| <b>MEDN1264</b>     | LIPID.P.0430 | 0.821 | 0.821 |
| <b>MEDN1264</b>     | LIPID.P.0433 | 0.874 | 0.874 |

|                     |              |       |       |
|---------------------|--------------|-------|-------|
| <b>MEDN1264</b>     | LIPID.P.0436 | 0.895 | 0.895 |
| <b>MEDN1264</b>     | LIPID.P.0131 | 0.564 | 0.564 |
| <b>MEDN1264</b>     | MEDP0618     | 0.299 | 0.299 |
| <b>MEDN1264</b>     | MEDP1412     | 0.238 | 0.238 |
| <b>MEDN1264</b>     | MEDP1416     | 0.148 | 0.148 |
| <b>MEDN1264</b>     | MEDP1433     | 0.350 | 0.350 |
| <b>MEDN1264</b>     | MEDP1917     | 0.219 | 0.219 |
| <b>MEDN1264</b>     | LIPID.P.0047 | 0.215 | 0.215 |
| <b>MEDN1264</b>     | LIPID.P.0153 | 0.154 | 0.154 |
| <b>LIPID.N.0119</b> | Pre_SPO2     | 0.481 | 0.481 |
| <b>LIPID.N.0132</b> | Pre_SPO2     | 0.503 | 0.503 |
| <b>LIPID.N.0413</b> | Pre_SPO2     | 0.518 | 0.518 |
| <b>MEDN1267</b>     | MEDN1269     | 0.762 | 0.762 |
| <b>MEDN1267</b>     | MEDN1287     | 0.900 | 0.900 |
| <b>MEDN1267</b>     | MEDP1875     | 0.862 | 0.862 |
| <b>MEDN1267</b>     | LIPID.N.0161 | 0.762 | 0.762 |
| <b>MEDN1267</b>     | LIPID.N.0165 | 0.753 | 0.753 |
| <b>MEDN1267</b>     | LIPID.P.0429 | 0.898 | 0.898 |
| <b>MEDN1267</b>     | LIPID.P.0430 | 0.773 | 0.773 |
| <b>MEDN1267</b>     | LIPID.P.0433 | 0.818 | 0.818 |
| <b>MEDN1267</b>     | LIPID.P.0436 | 0.869 | 0.869 |
| <b>MEDN1267</b>     | LIPID.P.0131 | 0.469 | 0.469 |
| <b>MEDN1267</b>     | MEDP0618     | 0.366 | 0.366 |
| <b>MEDN1267</b>     | MEDP1412     | 0.336 | 0.336 |
| <b>MEDN1267</b>     | MEDP1416     | 0.293 | 0.293 |
| <b>MEDN1267</b>     | MEDP1433     | 0.398 | 0.398 |
| <b>MEDN1267</b>     | MEDP1917     | 0.286 | 0.286 |
| <b>MEDN1267</b>     | LIPID.P.0047 | 0.297 | 0.297 |
| <b>MEDP1416</b>     | Pre_SPO2     | 0.521 | 0.521 |
| <b>LIPID.P.0047</b> | Pre_SPO2     | 0.522 | 0.522 |
| <b>MEDP1433</b>     | Pre_SPO2     | 0.523 | 0.523 |
| <b>MEDN1269</b>     | MEDN1287     | 0.448 | 0.448 |
| <b>MEDN1269</b>     | MEDP1875     | 0.551 | 0.551 |
| <b>MEDN1269</b>     | LIPID.N.0161 | 0.424 | 0.424 |
| <b>MEDN1269</b>     | LIPID.N.0165 | 0.683 | 0.683 |
| <b>MEDN1269</b>     | LIPID.P.0429 | 0.532 | 0.532 |
| <b>MEDN1269</b>     | LIPID.P.0430 | 0.451 | 0.451 |
| <b>MEDN1269</b>     | LIPID.P.0433 | 0.346 | 0.346 |
| <b>MEDN1269</b>     | LIPID.P.0436 | 0.444 | 0.444 |
| <b>MEDN1269</b>     | LIPID.P.0131 | 0.615 | 0.615 |
| <b>MEDN1269</b>     | MEDP0618     | 0.729 | 0.729 |
| <b>MEDN1269</b>     | MEDP1412     | 0.632 | 0.632 |
| <b>MEDN1269</b>     | MEDP1416     | 0.431 | 0.431 |

|                     |              |       |       |
|---------------------|--------------|-------|-------|
| <b>MEDN1269</b>     | MEDP1433     | 0.804 | 0.804 |
| <b>MEDN1269</b>     | MEDP1917     | 0.714 | 0.714 |
| <b>MEDN1269</b>     | LIPID.P.0047 | 0.667 | 0.667 |
| <b>LIPID.P.0391</b> | Pre_SPO2     | 0.528 | 0.528 |
| <b>LIPID.P.0352</b> | Pre_SPO2     | 0.532 | 0.532 |
| <b>LIPID.P.0388</b> | Pre_SPO2     | 0.547 | 0.547 |
| <b>MEDN1287</b>     | MEDP1875     | 0.875 | 0.875 |
| <b>MEDN1287</b>     | LIPID.N.0161 | 0.834 | 0.834 |
| <b>MEDN1287</b>     | LIPID.N.0165 | 0.648 | 0.648 |
| <b>MEDN1287</b>     | LIPID.P.0429 | 0.926 | 0.926 |
| <b>MEDN1287</b>     | LIPID.P.0430 | 0.855 | 0.855 |
| <b>MEDN1287</b>     | LIPID.P.0433 | 0.915 | 0.915 |
| <b>MEDN1287</b>     | LIPID.P.0436 | 0.932 | 0.932 |
| <b>MEDN1287</b>     | LIPID.P.0131 | 0.360 | 0.360 |
| <b>MEDN1287</b>     | MEDP0618     | 0.090 | 0.090 |
| <b>MEDN1287</b>     | MEDP1412     | 0.105 | 0.105 |
| <b>MEDN1287</b>     | MEDP1416     | 0.183 | 0.183 |
| <b>MEDN1287</b>     | MEDP1433     | 0.099 | 0.099 |
| <b>MEDN1287</b>     | MEDP1917     | 0.015 | 0.015 |
| <b>MEDN1287</b>     | LIPID.P.0047 | 0.046 | 0.046 |
| <b>MEDN1287</b>     | LIPID.P.0153 | 0.067 | 0.067 |
| <b>MEDP1412</b>     | Pre_SPO2     | 0.564 | 0.564 |
| <b>LIPID.P.0387</b> | Pre_SPO2     | 0.573 | 0.573 |
| <b>LIPID.P.0351</b> | Pre_SPO2     | 0.586 | 0.586 |
| <b>LIPID.P.0355</b> | Pre_SPO2     | 0.589 | 0.589 |
| <b>MEDP1875</b>     | LIPID.N.0161 | 0.658 | 0.658 |
| <b>MEDP1875</b>     | LIPID.N.0165 | 0.503 | 0.503 |
| <b>MEDP1875</b>     | LIPID.P.0429 | 0.856 | 0.856 |
| <b>MEDP1875</b>     | LIPID.P.0430 | 0.772 | 0.772 |
| <b>MEDP1875</b>     | LIPID.P.0433 | 0.813 | 0.813 |
| <b>MEDP1875</b>     | LIPID.P.0436 | 0.767 | 0.767 |
| <b>MEDP1875</b>     | LIPID.P.0131 | 0.457 | 0.457 |
| <b>MEDP1875</b>     | MEDP0618     | 0.241 | 0.241 |
| <b>MEDP1875</b>     | MEDP1412     | 0.347 | 0.347 |
| <b>MEDP1875</b>     | MEDP1416     | 0.371 | 0.371 |
| <b>MEDP1875</b>     | MEDP1433     | 0.261 | 0.261 |
| <b>MEDP1875</b>     | MEDP1917     | 0.179 | 0.179 |
| <b>MEDP1875</b>     | LIPID.P.0047 | 0.241 | 0.241 |
| <b>MEDP1875</b>     | LIPID.P.0550 | 0.016 | 0.016 |
| <b>MEDP1875</b>     | LIPID.P.0153 | 0.309 | 0.309 |
| <b>MEDN1287</b>     | Pre_SPO2     | 0.589 | 0.589 |
| <b>LIPID.P.0433</b> | Pre_SPO2     | 0.603 | 0.603 |
| <b>LIPID.N.0161</b> | LIPID.N.0165 | 0.895 | 0.895 |

|                     |              |       |       |
|---------------------|--------------|-------|-------|
| <b>LIPID.N.0161</b> | LIPID.P.0429 | 0.809 | 0.809 |
| <b>LIPID.N.0161</b> | LIPID.P.0430 | 0.934 | 0.934 |
| <b>LIPID.N.0161</b> | LIPID.P.0433 | 0.860 | 0.860 |
| <b>LIPID.N.0161</b> | LIPID.P.0436 | 0.914 | 0.914 |
| <b>LIPID.N.0161</b> | LIPID.P.0131 | 0.535 | 0.535 |
| <b>LIPID.N.0161</b> | MEDP0618     | 0.116 | 0.116 |
| <b>LIPID.N.0161</b> | MEDP1412     | 0.101 | 0.101 |
| <b>LIPID.N.0161</b> | MEDP1416     | 0.151 | 0.151 |
| <b>LIPID.N.0161</b> | MEDP1433     | 0.183 | 0.183 |
| <b>LIPID.N.0161</b> | MEDP1917     | 0.096 | 0.096 |
| <b>LIPID.N.0161</b> | LIPID.P.0047 | 0.095 | 0.095 |
| <b>LIPID.N.0161</b> | LIPID.P.0153 | 0.043 | 0.043 |
| <b>LIPID.N.0426</b> | Pre_SPO2     | 0.605 | 0.605 |
| <b>MEDP1697</b>     | Pre_SPO2     | 0.608 | 0.608 |
| <b>LIPID.P.0436</b> | Pre_SPO2     | 0.608 | 0.608 |
| <b>LIPID.P.0480</b> | Pre_SPO2     | 0.629 | 0.629 |
| <b>LIPID.N.0165</b> | LIPID.P.0429 | 0.684 | 0.684 |
| <b>LIPID.N.0165</b> | LIPID.P.0430 | 0.804 | 0.804 |
| <b>LIPID.N.0165</b> | LIPID.P.0433 | 0.671 | 0.671 |
| <b>LIPID.N.0165</b> | LIPID.P.0436 | 0.783 | 0.783 |
| <b>LIPID.N.0165</b> | LIPID.P.0131 | 0.655 | 0.655 |
| <b>LIPID.N.0165</b> | MEDP0618     | 0.408 | 0.408 |
| <b>LIPID.N.0165</b> | MEDP1412     | 0.291 | 0.291 |
| <b>LIPID.N.0165</b> | MEDP1416     | 0.214 | 0.214 |
| <b>LIPID.N.0165</b> | MEDP1433     | 0.494 | 0.494 |
| <b>LIPID.N.0165</b> | MEDP1917     | 0.406 | 0.406 |
| <b>LIPID.N.0165</b> | LIPID.P.0047 | 0.352 | 0.352 |
| <b>LIPID.P.0429</b> | Pre_SPO2     | 0.646 | 0.646 |
| <b>LIPID.P.0131</b> | Pre_SPO2     | 0.648 | 0.648 |
| <b>MEDN1269</b>     | Pre_SPO2     | 0.662 | 0.662 |
| <b>LIPID.P.0429</b> | LIPID.P.0430 | 0.879 | 0.879 |
| <b>LIPID.P.0429</b> | LIPID.P.0433 | 0.956 | 0.956 |
| <b>LIPID.P.0429</b> | LIPID.P.0436 | 0.942 | 0.942 |
| <b>LIPID.P.0429</b> | LIPID.P.0131 | 0.513 | 0.513 |
| <b>LIPID.P.0429</b> | MEDP0618     | 0.053 | 0.053 |
| <b>LIPID.P.0429</b> | MEDP1412     | 0.015 | 0.015 |
| <b>LIPID.P.0429</b> | MEDP1433     | 0.110 | 0.110 |
| <b>LIPID.P.0429</b> | MEDP1917     | 0.000 | 0.000 |
| <b>LIPID.P.0429</b> | LIPID.P.0047 | 0.036 | 0.036 |
| <b>LIPID.P.0429</b> | LIPID.P.0628 | 0.030 | 0.030 |
| <b>LIPID.P.0429</b> | LIPID.P.0153 | 0.248 | 0.248 |
| <b>MEDP1686</b>     | Pre_SPO2     | 0.668 | 0.668 |
| <b>MEDN1267</b>     | Pre_SPO2     | 0.685 | 0.685 |

|                     |              |       |       |
|---------------------|--------------|-------|-------|
| <b>MEDN1264</b>     | Pre_SPO2     | 0.693 | 0.693 |
| <b>LIPID.P.0430</b> | LIPID.P.0433 | 0.906 | 0.906 |
| <b>LIPID.P.0430</b> | LIPID.P.0436 | 0.920 | 0.920 |
| <b>LIPID.P.0430</b> | LIPID.P.0131 | 0.708 | 0.708 |
| <b>LIPID.P.0430</b> | MEDP0618     | 0.142 | 0.142 |
| <b>LIPID.P.0430</b> | MEDP1412     | 0.138 | 0.138 |
| <b>LIPID.P.0430</b> | MEDP1416     | 0.113 | 0.113 |
| <b>LIPID.P.0430</b> | MEDP1433     | 0.241 | 0.241 |
| <b>LIPID.P.0430</b> | MEDP1917     | 0.066 | 0.066 |
| <b>LIPID.P.0430</b> | LIPID.P.0047 | 0.073 | 0.073 |
| <b>LIPID.P.0430</b> | LIPID.P.0153 | 0.251 | 0.251 |
| <b>LIPID.N.0161</b> | Pre_SPO2     | 0.722 | 0.722 |
| <b>LIPID.N.0165</b> | Pre_SPO2     | 0.729 | 0.729 |
| <b>MEDP1875</b>     | Pre_SPO2     | 0.741 | 0.741 |
| <b>LIPID.P.0433</b> | LIPID.P.0436 | 0.973 | 0.973 |
| <b>LIPID.P.0433</b> | LIPID.P.0131 | 0.467 | 0.467 |
| <b>LIPID.P.0433</b> | LIPID.P.0550 | 0.004 | 0.004 |
| <b>LIPID.P.0433</b> | LIPID.P.0153 | 0.368 | 0.368 |
| <b>LIPID.P.0430</b> | Pre_SPO2     | 0.747 | 0.747 |
| <b>LIPID.P.0153</b> | RVAW         | 0.108 | 0.108 |
| <b>LIPID.P.0628</b> | RVAW         | 0.391 | 0.391 |
| <b>LIPID.P.0436</b> | LIPID.P.0131 | 0.497 | 0.497 |
| <b>LIPID.P.0436</b> | MEDP0618     | 0.089 | 0.089 |
| <b>LIPID.P.0436</b> | MEDP1412     | 0.029 | 0.029 |
| <b>LIPID.P.0436</b> | MEDP1416     | 0.013 | 0.013 |
| <b>LIPID.P.0436</b> | MEDP1433     | 0.120 | 0.120 |
| <b>LIPID.P.0436</b> | LIPID.P.0153 | 0.194 | 0.194 |
| <b>LIPID.P.0363</b> | RVAW         | 0.477 | 0.477 |
| <b>LIPID.P.0550</b> | RVAW         | 0.520 | 0.520 |
| <b>LIPID.P.0495</b> | RVAW         | 0.560 | 0.560 |
| <b>RVOTd</b>        | RVAW         | 0.705 | 0.705 |
| <b>LIPID.P.0131</b> | MEDP0618     | 0.512 | 0.512 |
| <b>LIPID.P.0131</b> | MEDP1412     | 0.386 | 0.386 |
| <b>LIPID.P.0131</b> | MEDP1416     | 0.109 | 0.109 |
| <b>LIPID.P.0131</b> | MEDP1433     | 0.651 | 0.651 |
| <b>LIPID.P.0131</b> | MEDP1917     | 0.427 | 0.427 |
| <b>LIPID.P.0131</b> | LIPID.P.0047 | 0.335 | 0.335 |
| <b>LIPID.P.0131</b> | LIPID.P.0550 | 0.044 | 0.044 |
| <b>LIPID.P.0131</b> | LIPID.P.0628 | 0.086 | 0.086 |
| <b>LIPID.P.0131</b> | LIPID.P.0153 | 0.321 | 0.321 |
| <b>LIPID.N.0119</b> | RVOT         | 0.002 | 0.002 |
| <b>LIPID.P.0047</b> | RVOT         | 0.033 | 0.033 |
| <b>MEDN1287</b>     | RVOT         | 0.052 | 0.052 |

|                     |              |       |       |
|---------------------|--------------|-------|-------|
| <b>MEDP0618</b>     | MEDP1412     | 0.893 | 0.893 |
| <b>MEDP0618</b>     | MEDP1416     | 0.671 | 0.671 |
| <b>MEDP0618</b>     | MEDP1433     | 0.953 | 0.953 |
| <b>MEDP0618</b>     | MEDP1917     | 0.898 | 0.898 |
| <b>MEDP0618</b>     | LIPID.P.0047 | 0.785 | 0.785 |
| <b>LIPID.P.0433</b> | RVOT         | 0.061 | 0.061 |
| <b>MEDP1699</b>     | RVOT         | 0.070 | 0.070 |
| <b>LIPID.P.0481</b> | RVOT         | 0.078 | 0.078 |
| <b>MEDP1412</b>     | MEDP1416     | 0.895 | 0.895 |
| <b>MEDP1412</b>     | MEDP1433     | 0.876 | 0.876 |
| <b>MEDP1412</b>     | MEDP1917     | 0.797 | 0.797 |
| <b>MEDP1412</b>     | LIPID.P.0047 | 0.797 | 0.797 |
| <b>MEDP1917</b>     | RVOT         | 0.083 | 0.083 |
| <b>LIPID.P.0430</b> | RVOT         | 0.085 | 0.085 |
| <b>LIPID.P.0131</b> | RVOT         | 0.085 | 0.085 |
| <b>MEDP1416</b>     | MEDP1433     | 0.632 | 0.632 |
| <b>MEDP1416</b>     | MEDP1917     | 0.660 | 0.660 |
| <b>MEDP1416</b>     | LIPID.P.0047 | 0.728 | 0.728 |
| <b>Pre_SPO2</b>     | RVOT         | 0.096 | 0.096 |
| <b>MEDP1697</b>     | RVOT         | 0.102 | 0.102 |
| <b>LIPID.P.0429</b> | RVOT         | 0.102 | 0.102 |
| <b>MEDP1433</b>     | MEDP1917     | 0.855 | 0.855 |
| <b>MEDP1433</b>     | LIPID.P.0047 | 0.761 | 0.761 |
| <b>MEDP1412</b>     | RVOT         | 0.106 | 0.106 |
| <b>MEDP1779</b>     | RVOT         | 0.110 | 0.110 |
| <b>LIPID.N.0250</b> | RVOT         | 0.128 | 0.128 |
| <b>MEDP1917</b>     | LIPID.P.0047 | 0.941 | 0.941 |
| <b>LIPID.N.0413</b> | RVOT         | 0.135 | 0.135 |
| <b>LIPID.N.0132</b> | RVOT         | 0.162 | 0.162 |
| <b>MEDP1686</b>     | RVOT         | 0.170 | 0.170 |
| <b>MEDP0618</b>     | RVOT         | 0.198 | 0.198 |
| <b>LIPID.P.0480</b> | RVOT         | 0.212 | 0.212 |
| <b>LIPID.P.0436</b> | RVOT         | 0.217 | 0.217 |
| <b>LIPID.P.0495</b> | LIPID.P.0550 | 0.831 | 0.831 |
| <b>LIPID.P.0495</b> | LIPID.P.0628 | 0.474 | 0.474 |
| <b>LIPID.P.0495</b> | LIPID.P.0363 | 0.966 | 0.966 |
| <b>LIPID.P.0495</b> | LIPID.P.0153 | 0.235 | 0.235 |
| <b>LIPID.P.0355</b> | RVOT         | 0.225 | 0.225 |
| <b>MEDN1264</b>     | RVOT         | 0.227 | 0.227 |
| <b>LIPID.P.0352</b> | RVOT         | 0.233 | 0.233 |
| <b>LIPID.P.0550</b> | LIPID.P.0628 | 0.507 | 0.507 |
| <b>LIPID.P.0550</b> | LIPID.P.0363 | 0.841 | 0.841 |
| <b>LIPID.P.0550</b> | LIPID.P.0153 | 0.678 | 0.678 |

|                     |              |       |       |
|---------------------|--------------|-------|-------|
| <b>LIPID.P.0387</b> | RVOT         | 0.236 | 0.236 |
| <b>LIPID.P.0388</b> | RVOT         | 0.236 | 0.236 |
| <b>LIPID.N.0161</b> | RVOT         | 0.256 | 0.256 |
| <b>LIPID.P.0628</b> | LIPID.P.0363 | 0.438 | 0.438 |
| <b>LIPID.P.0628</b> | LIPID.P.0153 | 0.320 | 0.320 |
| <b>LIPID.P.0491</b> | RVOT         | 0.266 | 0.266 |
| <b>MEDP1433</b>     | RVOT         | 0.268 | 0.268 |
| <b>LIPID.P.0506</b> | RVOT         | 0.268 | 0.268 |
| <b>LIPID.P.0363</b> | LIPID.P.0153 | 0.250 | 0.250 |
| <b>LIPID.P.0351</b> | RVOT         | 0.273 | 0.273 |
| <b>MEDN1267</b>     | RVOT         | 0.284 | 0.284 |
| <b>LIPID.N.0426</b> | RVOT         | 0.290 | 0.290 |
| <b>LIPID.P.0391</b> | RVOT         | 0.294 | 0.294 |
| <b>LIPID.P.0508</b> | RVOT         | 0.325 | 0.325 |
| <b>LIPID.P.0521</b> | RVOT         | 0.334 | 0.334 |
| <b>LIPID.P.0759</b> | RVOT         | 0.350 | 0.350 |
| <b>MEDN1269</b>     | RVOT         | 0.392 | 0.392 |
| <b>LIPID.N.0165</b> | RVOT         | 0.470 | 0.470 |
| <b>LIPID.P.0628</b> | RVOTd        | 0.126 | 0.126 |
| <b>LIPID.P.0495</b> | RVOTd        | 0.246 | 0.246 |
| <b>LIPID.P.0363</b> | RVOTd        | 0.249 | 0.249 |
| <b>LIPID.P.0153</b> | RVOTd        | 0.398 | 0.398 |
| <b>LIPID.P.0550</b> | RVOTd        | 0.478 | 0.478 |
