# Supplementary material for: Circular Network of Coregulated Sphingolipids Dictates Chronic Hypoxia Damage in Patients With Tetralogy of Fallot
Source: PubMed Central journal article supplement (PMC8792512; doi:10.3389/fcvm.2021.780123), 2022-01-13
Supplement: Table_6.pdf [file Table_6.pdf]

Table S6. The partial correlation between sphingomyelin related metabolites and clinical phenotypes in patients with TOF in right atrial biopsies.

| source       | target       | pearson_corr | weight |
|--------------|--------------|--------------|--------|
| LIPID.N.0465 | LIPID.P.0689 | 0.526        | 0.526  |
| LIPID.N.0465 | LIPID.N.0397 | 0.722        | 0.722  |
| LIPID.N.0465 | LIPID.N.0429 | 0.768        | 0.768  |
| LIPID.N.0465 | LIPID.P.0398 | 0.524        | 0.524  |
| LIPID.N.0465 | LIPID.N.0188 | 0.493        | 0.493  |
| LIPID.N.0465 | LIPID.N.0196 | 0.598        | 0.598  |
| LIPID.N.0465 | LIPID.N.0151 | 0.706        | 0.706  |
| LIPID.N.0465 | LIPID.N.0152 | 0.685        | 0.685  |
| LIPID.P.0048 | EF           | 0.085        | 0.085  |
| LIPID.N.0188 | EF           | 0.101        | 0.101  |
| LIPID.P.0039 | EF           | 0.143        | 0.143  |
| LIPID.N.0465 | EF           | 0.200        | 0.200  |
| LIPID.P.0689 | LIPID.N.0397 | 0.476        | 0.476  |
| LIPID.P.0689 | LIPID.N.0429 | 0.302        | 0.302  |
| LIPID.P.0689 | LIPID.P.0398 | 0.663        | 0.663  |
| LIPID.P.0689 | LIPID.N.0188 | 0.927        | 0.927  |
| LIPID.P.0689 | LIPID.N.0196 | 0.699        | 0.699  |
| LIPID.P.0689 | LIPID.N.0151 | 0.792        | 0.792  |
| LIPID.P.0689 | LIPID.N.0152 | 0.797        | 0.797  |
| LIPID.P.0013 | EF           | 0.264        | 0.264  |
| LIPID.P.0555 | EF           | 0.362        | 0.362  |
| LIPID.P.0037 | EF           | 0.374        | 0.374  |
| LIPID.N.0397 | LIPID.N.0429 | 0.523        | 0.523  |
| LIPID.N.0397 | LIPID.P.0398 | 0.746        | 0.746  |
| LIPID.N.0397 | LIPID.N.0188 | 0.430        | 0.430  |
| LIPID.N.0397 | LIPID.N.0196 | 0.521        | 0.521  |
| LIPID.N.0397 | LIPID.N.0151 | 0.613        | 0.613  |
| LIPID.N.0397 | LIPID.N.0152 | 0.681        | 0.681  |
| LIPID.N.0397 | LIPID.P.0505 | 0.072        | 0.072  |
| LIPID.N.0397 | LIPID.P.0508 | 0.179        | 0.179  |
| LIPID.N.0397 | LIPID.P.0520 | 0.136        | 0.136  |
| LIPID.N.0397 | LIPID.P.0111 | 0.165        | 0.165  |
| LIPID.P.0047 | EF           | 0.481        | 0.481  |
| LIPID.P.0035 | EF           | 0.511        | 0.511  |
| LIPID.N.0188 | IVS          | 0.459        | 0.459  |
| LIPID.N.0429 | LIPID.P.0398 | 0.123        | 0.123  |
| LIPID.N.0429 | LIPID.N.0188 | 0.129        | 0.129  |
| LIPID.N.0429 | LIPID.N.0196 | 0.356        | 0.356  |

|                     |              |       |       |
|---------------------|--------------|-------|-------|
| <b>LIPID.N.0429</b> | LIPID.N.0151 | 0.447 | 0.447 |
| <b>LIPID.N.0429</b> | LIPID.N.0152 | 0.474 | 0.474 |
| <b>LIPID.P.0689</b> | IVS          | 0.490 | 0.490 |
| <b>LIPID.P.0398</b> | IVS          | 0.501 | 0.501 |
| <b>LIPID.N.0429</b> | IVS          | 0.549 | 0.549 |
| <b>LIPID.N.0196</b> | IVS          | 0.556 | 0.556 |
| <b>LIPID.P.0398</b> | LIPID.N.0188 | 0.685 | 0.685 |
| <b>LIPID.P.0398</b> | LIPID.N.0196 | 0.678 | 0.678 |
| <b>LIPID.P.0398</b> | LIPID.N.0151 | 0.681 | 0.681 |
| <b>LIPID.P.0398</b> | LIPID.N.0152 | 0.744 | 0.744 |
| <b>LIPID.P.0398</b> | LIPID.P.0505 | 0.244 | 0.244 |
| <b>LIPID.P.0398</b> | LIPID.P.0508 | 0.313 | 0.313 |
| <b>LIPID.P.0398</b> | LIPID.P.0520 | 0.319 | 0.319 |
| <b>LIPID.P.0398</b> | LIPID.P.0567 | 0.120 | 0.120 |
| <b>LIPID.P.0398</b> | LIPID.P.0111 | 0.350 | 0.350 |
| <b>LIPID.P.0398</b> | LIPID.P.0039 | 0.021 | 0.021 |
| <b>LIPID.N.0465</b> | IVS          | 0.636 | 0.636 |
| <b>LIPID.N.0152</b> | IVS          | 0.641 | 0.641 |
| <b>LIPID.N.0151</b> | IVS          | 0.651 | 0.651 |
| <b>LIPID.N.0188</b> | LIPID.N.0196 | 0.702 | 0.702 |
| <b>LIPID.N.0188</b> | LIPID.N.0151 | 0.800 | 0.800 |
| <b>LIPID.N.0188</b> | LIPID.N.0152 | 0.779 | 0.779 |
| <b>RVOTd</b>        | IVS          | 0.678 | 0.678 |
| <b>LIPID.N.0397</b> | IVS          | 0.737 | 0.737 |
| <b>RVAW</b>         | IVS          | 0.877 | 0.877 |
| <b>EF</b>           | McGoon       | 0.133 | 0.133 |
| <b>LIPID.N.0196</b> | LIPID.N.0151 | 0.934 | 0.934 |
| <b>LIPID.N.0196</b> | LIPID.N.0152 | 0.931 | 0.931 |
| <b>LIPID.N.0196</b> | LIPID.P.0007 | 0.015 | 0.015 |
| <b>LIPID.P.0007</b> | McGoon       | 0.187 | 0.187 |
| <b>LIPID.P.0010</b> | McGoon       | 0.194 | 0.194 |
| <b>LIPID.P.0508</b> | McGoon       | 0.247 | 0.247 |
| <b>LIPID.N.0151</b> | LIPID.N.0152 | 0.976 | 0.976 |
| <b>RVOT</b>         | McGoon       | 0.258 | 0.258 |
| <b>LIPID.P.0111</b> | McGoon       | 0.305 | 0.305 |
| <b>LIPID.P.0520</b> | McGoon       | 0.307 | 0.307 |
| <b>LIPID.P.0505</b> | McGoon       | 0.350 | 0.350 |
| <b>LIPID.P.0013</b> | McGoon       | 0.428 | 0.428 |
| <b>LIPID.P.0567</b> | McGoon       | 0.461 | 0.461 |
| <b>LIPID.P.0505</b> | LIPID.P.0508 | 0.870 | 0.870 |
| <b>LIPID.P.0505</b> | LIPID.P.0520 | 0.980 | 0.980 |
| <b>LIPID.P.0505</b> | LIPID.P.0555 | 0.583 | 0.583 |
| <b>LIPID.P.0505</b> | LIPID.P.0567 | 0.873 | 0.873 |

|                     |              |       |       |
|---------------------|--------------|-------|-------|
| <b>LIPID.P.0505</b> | LIPID.P.0111 | 0.947 | 0.947 |
| <b>LIPID.P.0505</b> | LIPID.P.0010 | 0.029 | 0.029 |
| <b>LIPID.P.0505</b> | LIPID.P.0013 | 0.301 | 0.301 |
| <b>LIPID.P.0505</b> | LIPID.P.0035 | 0.480 | 0.480 |
| <b>LIPID.P.0505</b> | LIPID.P.0037 | 0.594 | 0.594 |
| <b>LIPID.P.0505</b> | LIPID.P.0039 | 0.811 | 0.811 |
| <b>LIPID.P.0505</b> | LIPID.P.0047 | 0.429 | 0.429 |
| <b>LIPID.P.0505</b> | LIPID.P.0048 | 0.820 | 0.820 |
| <b>LIPID.P.0035</b> | McGoon       | 0.479 | 0.479 |
| <b>LIPID.P.0048</b> | McGoon       | 0.511 | 0.511 |
| <b>LIPID.P.0508</b> | LIPID.P.0520 | 0.931 | 0.931 |
| <b>LIPID.P.0508</b> | LIPID.P.0555 | 0.385 | 0.385 |
| <b>LIPID.P.0508</b> | LIPID.P.0567 | 0.891 | 0.891 |
| <b>LIPID.P.0508</b> | LIPID.P.0111 | 0.945 | 0.945 |
| <b>LIPID.P.0508</b> | LIPID.P.0007 | 0.230 | 0.230 |
| <b>LIPID.P.0508</b> | LIPID.P.0010 | 0.321 | 0.321 |
| <b>LIPID.P.0508</b> | LIPID.P.0013 | 0.339 | 0.339 |
| <b>LIPID.P.0508</b> | LIPID.P.0035 | 0.351 | 0.351 |
| <b>LIPID.P.0508</b> | LIPID.P.0037 | 0.396 | 0.396 |
| <b>LIPID.P.0508</b> | LIPID.P.0039 | 0.677 | 0.677 |
| <b>LIPID.P.0508</b> | LIPID.P.0047 | 0.260 | 0.260 |
| <b>LIPID.P.0508</b> | LIPID.P.0048 | 0.695 | 0.695 |
| <b>LIPID.P.0039</b> | McGoon       | 0.514 | 0.514 |
| <b>LIPID.P.0555</b> | McGoon       | 0.570 | 0.570 |
| <b>LIPID.P.0047</b> | McGoon       | 0.629 | 0.629 |
| <b>LIPID.P.0520</b> | LIPID.P.0555 | 0.467 | 0.467 |
| <b>LIPID.P.0520</b> | LIPID.P.0567 | 0.887 | 0.887 |
| <b>LIPID.P.0520</b> | LIPID.P.0111 | 0.956 | 0.956 |
| <b>LIPID.P.0520</b> | LIPID.P.0007 | 0.074 | 0.074 |
| <b>LIPID.P.0520</b> | LIPID.P.0010 | 0.161 | 0.161 |
| <b>LIPID.P.0520</b> | LIPID.P.0013 | 0.292 | 0.292 |
| <b>LIPID.P.0520</b> | LIPID.P.0035 | 0.381 | 0.381 |
| <b>LIPID.P.0520</b> | LIPID.P.0037 | 0.483 | 0.483 |
| <b>LIPID.P.0520</b> | LIPID.P.0039 | 0.734 | 0.734 |
| <b>LIPID.P.0520</b> | LIPID.P.0047 | 0.316 | 0.316 |
| <b>LIPID.P.0520</b> | LIPID.P.0048 | 0.748 | 0.748 |
| <b>Pre_SPO2</b>     | McGoon       | 0.654 | 0.654 |
| <b>LIPID.P.0037</b> | McGoon       | 0.658 | 0.658 |
| <b>LIPID.P.0555</b> | LIPID.P.0567 | 0.416 | 0.416 |
| <b>LIPID.P.0555</b> | LIPID.P.0111 | 0.547 | 0.547 |
| <b>LIPID.P.0555</b> | LIPID.P.0013 | 0.550 | 0.550 |
| <b>LIPID.P.0555</b> | LIPID.P.0035 | 0.928 | 0.928 |
| <b>LIPID.P.0555</b> | LIPID.P.0037 | 0.975 | 0.975 |

|              |              |       |       |
|--------------|--------------|-------|-------|
| LIPID.P.0555 | LIPID.P.0039 | 0.925 | 0.925 |
| LIPID.P.0555 | LIPID.P.0047 | 0.916 | 0.916 |
| LIPID.P.0555 | LIPID.P.0048 | 0.903 | 0.903 |
| LIPID.P.0007 | Pre_SPO2     | 0.178 | 0.178 |
| LIPID.P.0010 | Pre_SPO2     | 0.240 | 0.240 |
| LIPID.P.0508 | Pre_SPO2     | 0.289 | 0.289 |
| LIPID.P.0567 | LIPID.P.0111 | 0.884 | 0.884 |
| LIPID.P.0567 | LIPID.P.0007 | 0.109 | 0.109 |
| LIPID.P.0567 | LIPID.P.0010 | 0.210 | 0.210 |
| LIPID.P.0567 | LIPID.P.0013 | 0.282 | 0.282 |
| LIPID.P.0567 | LIPID.P.0035 | 0.334 | 0.334 |
| LIPID.P.0567 | LIPID.P.0037 | 0.452 | 0.452 |
| LIPID.P.0567 | LIPID.P.0039 | 0.692 | 0.692 |
| LIPID.P.0567 | LIPID.P.0047 | 0.293 | 0.293 |
| LIPID.P.0567 | LIPID.P.0048 | 0.715 | 0.715 |
| LIPID.P.0111 | Pre_SPO2     | 0.325 | 0.325 |
| LIPID.P.0035 | Pre_SPO2     | 0.328 | 0.328 |
| LIPID.P.0013 | Pre_SPO2     | 0.404 | 0.404 |
| LIPID.P.0111 | LIPID.P.0007 | 0.003 | 0.003 |
| LIPID.P.0111 | LIPID.P.0010 | 0.092 | 0.092 |
| LIPID.P.0111 | LIPID.P.0013 | 0.317 | 0.317 |
| LIPID.P.0111 | LIPID.P.0035 | 0.488 | 0.488 |
| LIPID.P.0111 | LIPID.P.0037 | 0.538 | 0.538 |
| LIPID.P.0111 | LIPID.P.0039 | 0.808 | 0.808 |
| LIPID.P.0111 | LIPID.P.0047 | 0.370 | 0.370 |
| LIPID.P.0111 | LIPID.P.0048 | 0.790 | 0.790 |
| LIPID.P.0520 | Pre_SPO2     | 0.408 | 0.408 |
| LIPID.P.0555 | Pre_SPO2     | 0.427 | 0.427 |
| LIPID.P.0007 | LIPID.P.0010 | 0.990 | 0.990 |
| LIPID.P.0007 | LIPID.P.0013 | 0.544 | 0.544 |
| LIPID.P.0007 | LIPID.P.0035 | 0.001 | 0.001 |
| LIPID.P.0039 | Pre_SPO2     | 0.440 | 0.440 |
| LIPID.P.0047 | Pre_SPO2     | 0.470 | 0.470 |
| LIPID.P.0505 | Pre_SPO2     | 0.474 | 0.474 |
| LIPID.P.0010 | LIPID.P.0013 | 0.597 | 0.597 |
| LIPID.P.0010 | LIPID.P.0035 | 0.054 | 0.054 |
| LIPID.P.0010 | LIPID.P.0048 | 0.046 | 0.046 |
| LIPID.P.0037 | Pre_SPO2     | 0.488 | 0.488 |
| LIPID.P.0048 | Pre_SPO2     | 0.489 | 0.489 |
| LIPID.P.0567 | Pre_SPO2     | 0.520 | 0.520 |
| LIPID.P.0013 | LIPID.P.0035 | 0.759 | 0.759 |
| LIPID.P.0013 | LIPID.P.0037 | 0.621 | 0.621 |
| LIPID.P.0013 | LIPID.P.0039 | 0.534 | 0.534 |

|                     |              |       |       |
|---------------------|--------------|-------|-------|
| <b>LIPID.P.0013</b> | LIPID.P.0047 | 0.688 | 0.688 |
| <b>LIPID.P.0013</b> | LIPID.P.0048 | 0.578 | 0.578 |
| <b>LIPID.P.0398</b> | RVAW         | 0.400 | 0.400 |
| <b>LIPID.N.0196</b> | RVAW         | 0.462 | 0.462 |
| <b>LIPID.N.0188</b> | RVAW         | 0.582 | 0.582 |
| <b>LIPID.N.0152</b> | RVAW         | 0.585 | 0.585 |
| <b>LIPID.P.0035</b> | LIPID.P.0037 | 0.923 | 0.923 |
| <b>LIPID.P.0035</b> | LIPID.P.0039 | 0.852 | 0.852 |
| <b>LIPID.P.0035</b> | LIPID.P.0047 | 0.920 | 0.920 |
| <b>LIPID.P.0035</b> | LIPID.P.0048 | 0.831 | 0.831 |
| <b>LIPID.P.0689</b> | RVAW         | 0.593 | 0.593 |
| <b>LIPID.N.0429</b> | RVAW         | 0.616 | 0.616 |
| <b>LIPID.N.0151</b> | RVAW         | 0.648 | 0.648 |
| <b>LIPID.P.0037</b> | LIPID.P.0039 | 0.906 | 0.906 |
| <b>LIPID.P.0037</b> | LIPID.P.0047 | 0.964 | 0.964 |
| <b>LIPID.P.0037</b> | LIPID.P.0048 | 0.906 | 0.906 |
| <b>LIPID.N.0397</b> | RVAW         | 0.661 | 0.661 |
| <b>RVOTd</b>        | RVAW         | 0.705 | 0.705 |
| <b>LIPID.N.0465</b> | RVAW         | 0.742 | 0.742 |
| <b>LIPID.P.0037</b> | RVOT         | 0.042 | 0.042 |
| <b>LIPID.P.0039</b> | LIPID.P.0047 | 0.784 | 0.784 |
| <b>LIPID.P.0039</b> | LIPID.P.0048 | 0.982 | 0.982 |
| <b>LIPID.P.0567</b> | RVOT         | 0.042 | 0.042 |
| <b>LIPID.P.0508</b> | RVOT         | 0.044 | 0.044 |
| <b>LIPID.P.0048</b> | RVOT         | 0.055 | 0.055 |
| <b>LIPID.P.0047</b> | LIPID.P.0048 | 0.800 | 0.800 |
| <b>LIPID.P.0047</b> | RVOT         | 0.092 | 0.092 |
| <b>Pre_SPO2</b>     | RVOT         | 0.096 | 0.096 |
| <b>LIPID.N.0429</b> | RVOT         | 0.215 | 0.215 |
| <b>LIPID.P.0013</b> | RVOT         | 0.354 | 0.354 |
| <b>LIPID.P.0007</b> | RVOT         | 0.484 | 0.484 |
| <b>LIPID.P.0010</b> | RVOT         | 0.500 | 0.500 |
| <b>LIPID.P.0398</b> | RVOTd        | 0.311 | 0.311 |
| <b>LIPID.N.0397</b> | RVOTd        | 0.366 | 0.366 |
| <b>LIPID.N.0196</b> | RVOTd        | 0.487 | 0.487 |
| <b>LIPID.N.0465</b> | RVOTd        | 0.499 | 0.499 |
| <b>LIPID.N.0188</b> | RVOTd        | 0.542 | 0.542 |
| <b>LIPID.N.0151</b> | RVOTd        | 0.594 | 0.594 |
| <b>LIPID.N.0152</b> | RVOTd        | 0.609 | 0.609 |
| <b>LIPID.N.0429</b> | RVOTd        | 0.682 | 0.682 |
| <b>LIPID.P.0689</b> | RVOTd        | 0.695 | 0.695 |
